# Supplementary material for: EEG Microstate-Specific Functional Connectivity and Stroke-Related Alterations in Brain Dynamics
Source: PubMed Central journal article supplement (PMC9131012; doi:10.3389/fnins.2022.848737), 2022-05-11
Supplement: Data_Sheet_2.pdf [file Data_Sheet_2.pdf]

## *Supplementary Material*

### 1 Supplementary Tables

**Supplementary Table 1. Sample demographics of the LEMON dataset used in this study.**

| <b>Filename</b> | <b>Gender</b> | <b>Age</b> | <b>Handedness</b> |
|-----------------|---------------|------------|-------------------|
| sub-032303      | female        | 65–70      | right             |
| sub-032305      | female        | 65–70      | ambidexterity     |
| sub-032308      | female        | 60–65      | right             |
| sub-032318      | male          | 60–65      | right             |
| sub-032329      | female        | 65–70      | right             |
| sub-032331      | male          | 70–75      | right             |
| sub-032333      | male          | 70–75      | left              |
| sub-032337      | female        | 65–70      | right             |
| sub-032338      | male          | 65–70      | right             |
| sub-032340      | female        | 65–70      | left              |
| sub-032347      | male          | 75–80      | right             |
| sub-032369      | male          | 60–65      | right             |
| sub-032375      | male          | 65–70      | right             |
| sub-032377      | female        | 65–70      | right             |
| sub-032378      | male          | 55–60      | right             |
| sub-032391      | male          | 35–40      | right             |
| sub-032392      | female        | 65–70      | right             |
| sub-032395      | female        | 60–65      | right             |
| sub-032429      | male          | 30–35      | right             |
| sub-032444      | male          | 30–35      | right             |
| sub-032447      | male          | 60–65      | right             |
| sub-032450      | female        | 60–65      | right             |
| sub-032454      | male          | 60–65      | right             |
| sub-032457      | female        | 70–75      | right             |
| sub-032462      | male          | 65–70      | right             |
| sub-032475      | male          | 65–70      | right             |
| sub-032490      | male          | 70–75      | right             |
| sub-032491      | male          | 70–75      | right             |
| sub-032494      | male          | 65–70      | right             |
| sub-032495      | male          | 70–75      | right             |
| sub-032496      | male          | 60–65      | right             |
| sub-032497      | male          | 60–65      | right             |

**Supplementary Table 2. Statistics of EEG preprocessing metrics for patients and controls.**

| Parameters                       | Patients_T0                 | Patients_T1                 | Controls                    | <i>p</i> | Effect size |
|----------------------------------|-----------------------------|-----------------------------|-----------------------------|----------|-------------|
| Length of raw EEG (seconds)      | 258.7 ± 60.8<br>184.0–327.0 | 261.9 ± 60.9<br>184.0–322.0 | 228.5 ± 54.7<br>184.0–315.0 | 0.10     | 0.05        |
| Length of EEG retained (seconds) | 238.9 ± 54.6<br>175.1–305.6 | 243.1 ± 56.7<br>153.6–317.8 | 213.3 ± 49.8<br>162.2–301.4 | 0.11     | 0.05        |
| Removed channels (n)             | 1.2 ± 1.3<br>0–4            | 1.2 ± 1.6<br>0–6            | 0.8 ± 1.3<br>0–5            | 0.52     | 0.02        |
| Rejected components (n)          | 14.2 ± 6.6<br>4–28          | 13.7 ± 6.8<br>3–26          | 10.7 ± 4.2<br>4–21          | 0.15     | 0.02        |

Mean ± standard deviation and range for each parameter are provided in the table.

One-way ANOVA was performed across stroke patients at T0 and T1 and healthy controls of the length of raw EEG, length of EEG retained and removed channels; independent-samples Kruskal-Wallis test was performed for rejected components owing to violating the assumption of homogeneity of variance.

The eta-squared measure ( $\eta^2$ ) is used to indicate the effect size.

**Supplementary Table 3. Microstate-wise FC differences between each microstate pair for each group.**

|                  | Group pairs | B vs. A      | C vs. A      | C vs. B                      | D vs. A      | D vs. B      | D vs. C                      | E vs. A      | E vs. B      | E vs. C      | E vs. D      |
|------------------|-------------|--------------|--------------|------------------------------|--------------|--------------|------------------------------|--------------|--------------|--------------|--------------|
| X vs. Y<br>X > Y | Controls    | <b>0.001</b> | <b>0.001</b> | <b>0.001</b>                 | <b>0.001</b> | <b>0.001</b> | <b>0.047</b><br><b>0.048</b> | <b>0.001</b> | <b>0.001</b> | <b>0.021</b> | <b>0.001</b> |
|                  | LEMON       | <b>0.001</b> | <b>0.001</b> | <b>0.001</b>                 | <b>0.001</b> | <b>0.001</b> | <b>0.004</b>                 | <b>0.001</b> | <b>0.001</b> | <b>0.002</b> | <b>0.001</b> |
|                  | Patients_T0 | <b>0.001</b> | <b>0.001</b> | <b>0.001</b>                 | <b>0.001</b> | <b>0.001</b> | <b>0.014</b>                 | <b>0.001</b> | <b>0.001</b> | <b>0.008</b> | <b>0.001</b> |
|                  | Patients_T1 | <b>0.001</b> | <b>0.001</b> | <b>0.001</b>                 | <b>0.001</b> | <b>0.001</b> | <b>0.009</b>                 | <b>0.001</b> | <b>0.001</b> | <b>0.004</b> | <b>0.001</b> |
| X vs. Y<br>X < Y | Controls    | <b>0.001</b> | 0.096        | <b>0.048</b><br><b>0.038</b> | <b>0.002</b> | <b>0.002</b> | <b>0.001</b>                 | <b>0.001</b> | <b>0.002</b> | <b>0.001</b> | <b>0.001</b> |
|                  | LEMON       | <b>0.001</b> | <b>0.004</b> | <b>0.002</b>                 | <b>0.001</b> | <b>0.001</b> | <b>0.001</b>                 | <b>0.001</b> | <b>0.001</b> | <b>0.001</b> | <b>0.001</b> |
|                  | Patients_T0 | <b>0.001</b> | <b>0.026</b> | <b>0.027</b>                 | <b>0.001</b> | <b>0.002</b> | <b>0.001</b>                 | <b>0.001</b> | <b>0.001</b> | <b>0.001</b> | <b>0.001</b> |
|                  | Patients_T1 | <b>0.001</b> | <b>0.049</b> | 0.099                        | <b>0.001</b> | <b>0.002</b> | <b>0.001</b>                 | <b>0.001</b> | <b>0.001</b> | <b>0.001</b> | <b>0.001</b> |

*p*-values of the significant connected components are reported in the table.

For each X vs. Y, 2000 times permutations were performed.

Significant differences are indicated in bold.

**Supplementary Table 4. Group average statistics ( $\pm$  SD) of the Patients at T0, Patients at T1, and Healthy Controls for all classes of GEV, mean duration, occurrence, coverage, mean interval, and mean GFP.**

| Parameter          | Microstate | Patients at T0 |         | Patients at T1 |         | Controls |         |
|--------------------|------------|----------------|---------|----------------|---------|----------|---------|
|                    |            | Mean           | SD      | Mean           | SD      | Mean     | SD      |
| GEV (%)            | Class A    | 14.256         | 4.072   | 13.235         | 4.923   | 9.237    | 3.542   |
|                    | Class B    | 12.294         | 4.422   | 11.750         | 4.971   | 8.170    | 2.568   |
|                    | Class C    | 20.048         | 6.542   | 21.306         | 8.124   | 27.739   | 9.091   |
|                    | Class D    | 4.837          | 2.272   | 5.218          | 1.855   | 5.057    | 2.108   |
|                    | Class E    | 8.043          | 3.619   | 8.344          | 3.222   | 7.794    | 3.258   |
| Mean Duration (ms) | Class A    | 61.948         | 4.446   | 61.265         | 5.529   | 57.570   | 4.226   |
|                    | Class B    | 59.852         | 4.901   | 59.606         | 5.135   | 57.378   | 3.838   |
|                    | Class C    | 68.632         | 9.981   | 71.039         | 12.342  | 82.243   | 18.594  |
|                    | Class D    | 51.423         | 4.276   | 52.035         | 3.957   | 52.809   | 4.243   |
|                    | Class E    | 54.629         | 4.540   | 55.352         | 4.906   | 56.548   | 5.125   |
| Occurrence (Hz)    | Class A    | 3.855          | 0.471   | 3.680          | 0.508   | 3.241    | 0.651   |
|                    | Class B    | 3.559          | 0.595   | 3.420          | 0.672   | 3.070    | 0.564   |
|                    | Class C    | 3.839          | 0.443   | 3.841          | 0.523   | 4.093    | 0.464   |
|                    | Class D    | 2.355          | 0.635   | 2.466          | 0.494   | 2.513    | 0.612   |
|                    | Class E    | 2.826          | 0.561   | 2.866          | 0.595   | 2.804    | 0.655   |
| Coverage (%)       | Class A    | 23.968         | 3.975   | 22.703         | 4.609   | 18.835   | 4.786   |
|                    | Class B    | 21.516         | 4.983   | 20.650         | 5.378   | 17.739   | 3.947   |
|                    | Class C    | 26.571         | 6.142   | 27.671         | 7.651   | 33.978   | 9.928   |
|                    | Class D    | 12.301         | 3.970   | 12.935         | 3.163   | 13.393   | 3.947   |
|                    | Class E    | 15.635         | 4.299   | 16.047         | 4.386   | 16.062   | 4.626   |
| Mean Interval (ms) | Class A    | 202.032        | 37.650  | 216.871        | 50.796  | 265.043  | 75.438  |
|                    | Class B    | 230.226        | 57.530  | 246.226        | 75.661  | 281.304  | 73.521  |
|                    | Class C    | 195.355        | 35.094  | 194.645        | 46.566  | 165.591  | 39.040  |
|                    | Class D    | 421.935        | 213.009 | 371.710        | 101.181 | 371.522  | 122.792 |
|                    | Class E    | 313.032        | 78.218  | 310.774        | 90.554  | 323.261  | 115.269 |
| Mean GFP (a.u.)    | Class A    | 0.921          | 0.048   | 0.910          | 0.065   | 0.877    | 0.047   |
|                    | Class B    | 0.907          | 0.049   | 0.903          | 0.054   | 0.866    | 0.047   |
|                    | Class C    | 0.979          | 0.045   | 0.980          | 0.056   | 1.019    | 0.034   |
|                    | Class D    | 0.819          | 0.071   | 0.827          | 0.065   | 0.826    | 0.064   |
|                    | Class E    | 0.874          | 0.038   | 0.877          | 0.042   | 0.875    | 0.044   |

SD: standard deviation.

**Supplementary Table 5. Patients at T0 vs. Controls for each microstate class of GEV, mean duration, occurrence, coverage, mean interval, and mean GFP.**

| Parameter     | Microstate | $p$              | $p_{perm}$       | $p_{holm}$       | $p_{perm-holm}$  | Cohen's $d$   |
|---------------|------------|------------------|------------------|------------------|------------------|---------------|
| GEV           | Class A    | <b>&lt;0.001</b> | <b>&lt;0.001</b> | <b>&lt;0.001</b> | <b>&lt;0.001</b> | <b>1.301</b>  |
|               | Class B    | <b>&lt;0.001</b> | <b>&lt;0.001</b> | <b>0.001</b>     | <b>0.001</b>     | <b>1.099</b>  |
|               | Class C    | <b>0.001</b>     | <b>0.001</b>     | <b>0.002</b>     | <b>0.002</b>     | <b>-0.996</b> |
|               | Class D    | 0.718            | 0.720            | 1.000            | 1.000            | -0.100        |
|               | Class E    | 0.795            | 0.799            | 0.795            | 0.799            | 0.072         |
| Mean Duration | Class A    | <b>0.001</b>     | <b>0.001</b>     | <b>0.003</b>     | <b>0.003</b>     | <b>1.006</b>  |
|               | Class B    | 0.050            | 0.049            | 0.150            | 0.148            | 0.552         |
|               | Class C    | <b>0.001</b>     | <b>0.001</b>     | <b>0.004</b>     | <b>0.003</b>     | <b>-0.954</b> |
|               | Class D    | 0.243            | 0.243            | 0.243            | 0.243            | -0.325        |
|               | Class E    | 0.152            | 0.153            | 0.304            | 0.306            | -0.400        |
| Occurrence    | Class A    | <b>&lt;0.001</b> | <b>&lt;0.001</b> | <b>0.001</b>     | <b>0.001</b>     | <b>1.108</b>  |
|               | Class B    | <b>0.004</b>     | <b>0.004</b>     | <b>0.014</b>     | <b>0.015</b>     | <b>0.839</b>  |
|               | Class C    | 0.047            | 0.047            | 0.140            | 0.140            | -0.561        |
|               | Class D    | 0.364            | 0.362            | 0.727            | 0.724            | -0.252        |
|               | Class E    | 0.894            | 0.894            | 0.894            | 0.894            | 0.037         |
| Coverage      | Class A    | <b>&lt;0.001</b> | <b>&lt;0.001</b> | <b>&lt;0.001</b> | <b>&lt;0.001</b> | <b>1.184</b>  |
|               | Class B    | <b>0.004</b>     | <b>0.004</b>     | <b>0.012</b>     | <b>0.012</b>     | <b>0.826</b>  |
|               | Class C    | <b>0.001</b>     | <b>0.001</b>     | <b>0.006</b>     | <b>0.005</b>     | <b>-0.930</b> |
|               | Class D    | 0.321            | 0.320            | 0.642            | 0.640            | -0.276        |
|               | Class E    | 0.728            | 0.731            | 0.728            | 0.731            | -0.096        |
| Mean Interval | Class A    | <b>&lt;0.001</b> | <b>&lt;0.001</b> | <b>0.001</b>     | <b>0.001</b>     | <b>-1.109</b> |
|               | Class B    | <b>0.006</b>     | <b>0.006</b>     | <b>0.018</b>     | <b>0.018</b>     | <b>-0.789</b> |
|               | Class C    | <b>0.005</b>     | <b>0.005</b>     | <b>0.020</b>     | <b>0.021</b>     | <b>0.808</b>  |
|               | Class D    | 0.315            | 0.331            | 0.629            | 0.662            | 0.279         |
|               | Class E    | 0.699            | 0.707            | 0.699            | 0.707            | -0.107        |
| Mean GFP      | Class A    | <b>0.001</b>     | <b>0.001</b>     | <b>0.006</b>     | <b>0.001</b>     | <b>0.925</b>  |
|               | Class B    | <b>0.003</b>     | <b>0.003</b>     | <b>0.010</b>     | <b>0.003</b>     | <b>0.849</b>  |
|               | Class C    | <b>0.001</b>     | <b>0.001</b>     | <b>0.005</b>     | <b>0.001</b>     | <b>-0.964</b> |
|               | Class D    | 0.704            | 0.708            | 1.000            | 0.708            | -0.105        |
|               | Class E    | 0.927            | 0.926            | 0.927            | 0.926            | -0.025        |

Post hoc pairwise group comparisons of microstate parameters between Patients at T0 and Controls.  $p$  values refer to two-sided independent sample  $t$ -tests and  $p_{perm}$  values refer to the permutation-based method (100000 times permutations).  $p_{holm}$  and  $p_{perm-holm}$  values refer to Bonferroni-Holm corrected  $p$ -values for  $p$  and  $p_{perm}$  respectively. Cohen's  $d$  refers to two-sided independent sample  $t$ -tests. Significant differences survived correction are indicated in bold.

**Supplementary Table 6. Patients at T1 vs. Controls for each microstate class of GEV, mean duration, occurrence, coverage, mean interval, and mean GFP.**

| Parameter     | Microstate | $p$          | $p_{perm}$   | $p_{holm}$   | $p_{perm-holm}$ | Cohen's $d$   |
|---------------|------------|--------------|--------------|--------------|-----------------|---------------|
| GEV           | Class A    | <b>0.002</b> | <b>0.001</b> | <b>0.009</b> | <b>0.006</b>    | <b>0.910</b>  |
|               | Class B    | <b>0.003</b> | <b>0.003</b> | <b>0.011</b> | <b>0.010</b>    | <b>0.867</b>  |
|               | Class C    | <b>0.009</b> | <b>0.009</b> | <b>0.026</b> | <b>0.027</b>    | <b>-0.753</b> |
|               | Class D    | 0.768        | 0.768        | 0.768        | 0.768           | 0.082         |
|               | Class E    | 0.540        | 0.538        | 1.000        | 1.000           | 0.170         |
| Mean Duration | Class A    | <b>0.010</b> | <b>0.009</b> | <b>0.050</b> | <b>0.045</b>    | <b>0.736</b>  |
|               | Class B    | 0.086        | 0.085        | 0.259        | 0.256           | 0.481         |
|               | Class C    | <b>0.010</b> | <b>0.010</b> | <b>0.041</b> | <b>0.040</b>    | <b>-0.732</b> |
|               | Class D    | 0.494        | 0.492        | 0.494        | 0.492           | -0.189        |
|               | Class E    | 0.389        | 0.389        | 0.777        | 0.779           | -0.239        |
| Occurrence    | Class A    | <b>0.007</b> | <b>0.007</b> | <b>0.037</b> | <b>0.037</b>    | <b>0.767</b>  |
|               | Class B    | 0.049        | 0.048        | 0.194        | 0.191           | 0.556         |
|               | Class C    | 0.072        | 0.072        | 0.217        | 0.217           | -0.505        |
|               | Class D    | 0.758        | 0.756        | 0.758        | 0.756           | -0.085        |
|               | Class E    | 0.717        | 0.716        | 1.000        | 1.000           | 0.100         |
| Coverage      | Class A    | <b>0.004</b> | <b>0.005</b> | <b>0.021</b> | <b>0.023</b>    | <b>0.826</b>  |
|               | Class B    | 0.033        | 0.034        | 0.099        | 0.102           | 0.603         |
|               | Class C    | <b>0.011</b> | <b>0.011</b> | <b>0.044</b> | <b>0.043</b>    | <b>-0.726</b> |
|               | Class D    | 0.637        | 0.637        | 1.000        | 1.000           | -0.131        |
|               | Class E    | 0.991        | 0.991        | 0.991        | 0.991           | -0.003        |
| Mean Interval | Class A    | <b>0.007</b> | <b>0.006</b> | <b>0.035</b> | <b>0.031</b>    | <b>-0.772</b> |
|               | Class B    | 0.094        | 0.094        | 0.283        | 0.281           | -0.469        |
|               | Class C    | 0.019        | 0.019        | 0.075        | 0.076           | 0.667         |
|               | Class D    | 0.995        | 0.996        | 0.995        | 0.996           | 0.002         |
|               | Class E    | 0.657        | 0.661        | 1.000        | 1.000           | -0.123        |
| Mean GFP      | Class A    | 0.040        | 0.039        | 0.120        | 0.116           | 0.579         |
|               | Class B    | <b>0.012</b> | <b>0.012</b> | <b>0.048</b> | <b>0.049</b>    | <b>0.716</b>  |
|               | Class C    | <b>0.005</b> | <b>0.003</b> | <b>0.023</b> | <b>0.015</b>    | <b>-0.814</b> |
|               | Class D    | 0.973        | 0.972        | 0.973        | 0.972           | 0.009         |
|               | Class E    | 0.874        | 0.875        | 1.000        | 1.000           | 0.044         |

Post hoc pairwise group comparisons of microstate parameters between Patients at T1 and Controls.  $p$  values refer to two-sided independent sample  $t$ -tests and  $p_{perm}$  values refer to the permutation-based method (100000 times permutations).  $p_{holm}$  and  $p_{perm-holm}$  values refer to Bonferroni-Holm corrected  $p$ -values for  $p$  and  $p_{perm}$  respectively. Cohen's  $d$  refers to two-sided independent sample  $t$ -tests. Significant differences survived correction are indicated in bold.

**Supplementary Table 7. Patients vs. Controls for Spatial Correlation metric (SC) and Transition Probability (TP).**

| Timepoint | Parameters             | $p$          | $p_{perm}$   | $p_{holm}$   | $p_{perm-holm}$ | Cohen's $d$  |
|-----------|------------------------|--------------|--------------|--------------|-----------------|--------------|
| <b>T0</b> | <b>SC<sub>AA</sub></b> | <b>0.001</b> | <b>0.001</b> | <b>0.031</b> | <b>0.032</b>    | <b>0.938</b> |
|           | <b>SC<sub>AB</sub></b> | <b>0.001</b> | <b>0.002</b> | <b>0.031</b> | <b>0.037</b>    | <b>0.934</b> |
|           | <b>SC<sub>BA</sub></b> | <b>0.001</b> | <b>0.001</b> | <b>0.028</b> | <b>0.032</b>    | <b>0.950</b> |
|           | <b>SC<sub>BB</sub></b> | <b>0.002</b> | <b>0.002</b> | <b>0.034</b> | <b>0.040</b>    | <b>0.919</b> |
|           | SC <sub>EE</sub>       | 0.049        | 0.048        | 1.000        | 1.000           | 0.554        |
|           | TP <sub>BA</sub>       | 0.030        | 0.030        | 0.504        | 0.513           | 0.616        |
|           | TP <sub>BC</sub>       | 0.038        | 0.037        | 0.604        | 0.588           | -0.587       |
|           | TP <sub>DC</sub>       | 0.024        | 0.022        | 0.427        | 0.403           | -0.641       |
|           | TP <sub>EA</sub>       | 0.004        | 0.004        | 0.074        | 0.071           | 0.836        |
|           | TP <sub>EC</sub>       | 0.007        | 0.005        | 0.124        | 0.089           | -0.780       |
| <b>T1</b> | SC <sub>AA</sub>       | 0.003        | 0.003        | 0.059        | 0.058           | 0.868        |
|           | <b>SC<sub>AB</sub></b> | <b>0.001</b> | <b>0.001</b> | <b>0.028</b> | <b>0.030</b>    | <b>0.951</b> |
|           | <b>SC<sub>BA</sub></b> | <b>0.001</b> | <b>0.001</b> | <b>0.031</b> | <b>0.032</b>    | <b>0.936</b> |
|           | <b>SC<sub>BB</sub></b> | <b>0.002</b> | <b>0.002</b> | <b>0.046</b> | <b>0.050</b>    | <b>0.895</b> |
|           | SC <sub>DD</sub>       | 0.018        | 0.018        | 0.379        | 0.378           | 0.672        |
|           | SC <sub>EE</sub>       | 0.031        | 0.032        | 0.629        | 0.632           | 0.608        |
|           | TP <sub>EA</sub>       | 0.007        | 0.007        | 0.143        | 0.135           | 0.771        |

Post hoc pairwise group comparisons of SC and TP for Patients at T0 vs. Controls and Patients at T1 vs. Controls.  $p$  values refer to two-sided independent sample  $t$ -tests and  $p_{perm}$  values refer to the permutation-based method (100000 times permutations).  $p_{holm}$  and  $p_{perm-holm}$  values refer to Bonferroni-Holm corrected  $p$ -values for  $p$  and  $p_{perm}$  respectively. Cohen's  $d$  refers to two-sided independent sample  $t$ -tests. Significant differences survived correction are indicated in bold. Only the items their  $p_{perm}$  values  $< 0.05$  are provided in this table.

**Supplementary Table 8. Two-sided correlation analysis between microstate parameters (GEV, mean duration, occurrence, coverage, mean interval, and mean GFP) and FMAL.**

| Parameter     | Microstate | Parameter_T0-FMAL_T0                                        | Parameter_T1-FMAL_T1                                           |
|---------------|------------|-------------------------------------------------------------|----------------------------------------------------------------|
| GEV           | Class A    | $r = -0.386, p = 0.032, CI [-0.575, -0.097]$                | $r = -0.107, p = 0.565, CI [-0.369, 0.295]$                    |
|               | Class B    | $r = -0.011, p = 0.953, CI [-0.298, 0.311]$                 | $r = 0.232, p = 0.210, CI [-0.100, 0.530]$                     |
|               | Class C    | $r = -0.066, p = 0.725, CI [-0.413, 0.239]$                 | $r = -0.305, p = 0.094, CI [-0.595, 0.061]$                    |
|               | Class D    | $r = 0.176, p = 0.345, CI [-0.130, 0.451]$                  | $r = 0.334, p = 0.067, CI [-0.059, 0.640]$                     |
|               | Class E    | $r = -0.091, p = 0.631, CI [-0.565, 0.287]$                 | $r = 0.052, p = 0.777, CI [-0.372, 0.428]$                     |
| Mean Duration | Class A    | $r = -0.251, p = 0.173, CI [-0.482, 0.020]$                 | $r = -0.073, p = 0.696, CI [-0.359, 0.308]$                    |
|               | Class B    | $r = 0.046, p = 0.806, CI [-0.254, 0.383]$                  | $r = 0.318, p = 0.080, CI [-0.086, 0.610]$                     |
|               | Class C    | $r = -0.064, p = 0.735, CI [-0.364, 0.225]$                 | $r = -0.272, p = 0.138, CI [-0.582, 0.057]$                    |
|               | Class D    | $r = 0.201, p = 0.279, CI [-0.095, 0.506]$                  | <b><math>r = 0.497, p = 0.005, CI [0.185, 0.703]</math></b>    |
|               | Class E    | $r = -0.114, p = 0.540, CI [-0.544, 0.253]$                 | $r = 0.131, p = 0.484, CI [-0.192, 0.411]$                     |
| Occurrence    | Class A    | $r = -0.223, p = 0.228, CI [-0.481, 0.113]$                 | $r = -0.072, p = 0.700, CI [-0.355, 0.338]$                    |
|               | Class B    | $r = 0.111, p = 0.552, CI [-0.189, 0.421]$                  | $r = 0.240, p = 0.192, CI [-0.115, 0.606]$                     |
|               | Class C    | $r = -0.023, p = 0.904, CI [-0.386, 0.265]$                 | <b><math>r = -0.411, p = 0.021, CI [-0.649, -0.047]</math></b> |
|               | Class D    | $r = 0.239, p = 0.196, CI [-0.101, 0.528]$                  | <b><math>r = 0.430, p = 0.016, CI [0.031, 0.715]</math></b>    |
|               | Class E    | $r = 0.102, p = 0.583, CI [-0.386, 0.481]$                  | $r = 0.039, p = 0.837, CI [-0.402, 0.468]$                     |
| Coverage      | Class A    | $r = -0.271, p = 0.140, CI [-0.516, 0.052]$                 | $r = -0.089, p = 0.632, CI [-0.376, 0.311]$                    |
|               | Class B    | $r = 0.094, p = 0.615, CI [-0.201, 0.400]$                  | $r = 0.274, p = 0.135, CI [-0.097, 0.618]$                     |
|               | Class C    | $r = -0.064, p = 0.732, CI [-0.408, 0.232]$                 | <b><math>r = -0.372, p = 0.040, CI [-0.650, -0.033]</math></b> |
|               | Class D    | $r = 0.224, p = 0.225, CI [-0.093, 0.530]$                  | <b><math>r = 0.480, p = 0.006, CI [0.079, 0.743]</math></b>    |
|               | Class E    | $r = 0.025, p = 0.834, CI [-0.473, 0.413]$                  | $r = 0.059, p = 0.756, CI [-0.355, 0.449]$                     |
| Mean Interval | Class A    | $r = 0.231, p = 0.213, CI [-0.080, 0.479]$                  | $r = 0.066, p = 0.725, CI [-0.346, 0.334]$                     |
|               | Class B    | $r = -0.123, p = 0.511, CI [-0.450, 0.166]$                 | $r = -0.271, p = 0.138, CI [-0.641, 0.081]$                    |
|               | Class C    | $r = 0.025, p = 0.895, CI [-0.266, 0.365]$                  | <b><math>r = 0.394, p = 0.027, CI [0.046, 0.645]</math></b>    |
|               | Class D    | $r = -0.282, p = 0.121, CI [-0.610, 0.004]$                 | <b><math>r = -0.512, p = 0.003, CI [-0.755, -0.045]</math></b> |
|               | Class E    | $r = -0.072, p = 0.704, CI [-0.479, 0.415]$                 | $r = -0.133, p = 0.478, CI [-0.594, 0.283]$                    |
| Mean GFP      | Class A    | $r = -0.077, p = 0.683, CI [-0.363, 0.224]$                 | $r = 0.041, p = 0.827, CI [-0.262, 0.352]$                     |
|               | Class B    | $r = 0.179, p = 0.340, CI [-0.114, 0.460]$                  | $r = 0.215, p = 0.244, CI [-0.102, 0.466]$                     |
|               | Class C    | $r = 0.298, p = 0.104, CI [0.067, 0.502]$                   | $r = -0.056, p = 0.766, CI [-0.378, 0.254]$                    |
|               | Class D    | <b><math>r = 0.359, p = 0.046, CI [0.072, 0.627]</math></b> | $r = 0.106, p = 0.568, CI [-0.243, 0.372]$                     |
|               | Class E    | $r = 0.081, p = 0.667, CI [-0.299, 0.442]$                  | $r = 0.133, p = 0.475, CI [-0.297, 0.483]$                     |

Significant correlations are indicated in bold. Pearson correlation coefficient ( $r$ ) and the corresponding permutation-based  $p$ -value are given. 95% confidence interval was computed by the bootstrap method (bias corrected and accelerated) with 10000 bootstrap data samples.  $p$ -values are not corrected for multiple comparisons.

**Supplementary Table 9. Two-sided correlation analysis between SC/TP and FMAL.**

| Microstate Parameter        | Parameter_T0-FMAL_T0                                                | Parameter_T1-FMAL_T1                        |
|-----------------------------|---------------------------------------------------------------------|---------------------------------------------|
| Spatial Correlation metrics | <b>SC<sub>AA</sub></b> $r = -0.420, p = 0.020, CI [-0.650, -0.087]$ | $r = -0.043, p = 0.822, CI [-0.356, 0.293]$ |
|                             | <b>SC<sub>AB</sub></b> $r = -0.387, p = 0.032, CI [-0.620, -0.081]$ | $r = 0.064, p = 0.731, CI [-0.268, 0.384]$  |
|                             | <b>SC<sub>AC</sub></b> $r = -0.401, p = 0.025, CI [-0.647, -0.068]$ | $r = -0.290, p = 0.111, CI [-0.573, 0.046]$ |
|                             | <b>SC<sub>AD</sub></b> $r = -0.369, p = 0.040, CI [-0.631, 0.023]$  | $r = -0.223, p = 0.228, CI [-0.562, 0.246]$ |
|                             | <b>SC<sub>AE</sub></b> $r = -0.379, p = 0.034, CI [-0.643, -0.062]$ | $r = -0.193, p = 0.298, CI [-0.521, 0.166]$ |
|                             | <b>SC<sub>CA</sub></b> $r = -0.391, p = 0.029, CI [-0.633, -0.001]$ | $r = -0.305, p = 0.095, CI [-0.579, 0.090]$ |
|                             | <b>SC<sub>EE</sub></b> $r = 0.363, p = 0.045, CI [-0.610, -0.020]$  | $r = -0.072, p = 0.701, CI [-0.430, 0.244]$ |
| Transition Probability      | <b>TP<sub>CA</sub></b> $r = -0.384, p = 0.033, CI [-0.609, -0.105]$ | $r = -0.275, p = 0.134, CI [-0.618, 0.173]$ |

Significant correlations are indicated in bold. Pearson correlation coefficient ( $r$ ) and the corresponding permutation-based  $p$ -value are given. 95% confidence interval was computed by the bootstrap method (bias corrected and accelerated) with 10000 bootstrap data samples. Only the items at T0 their  $p$  values  $< 0.05$  are provided in this table. At T1, there was no significant result.  $p$ -values are not corrected for multiple comparisons.

## 2 Supplementary Figures

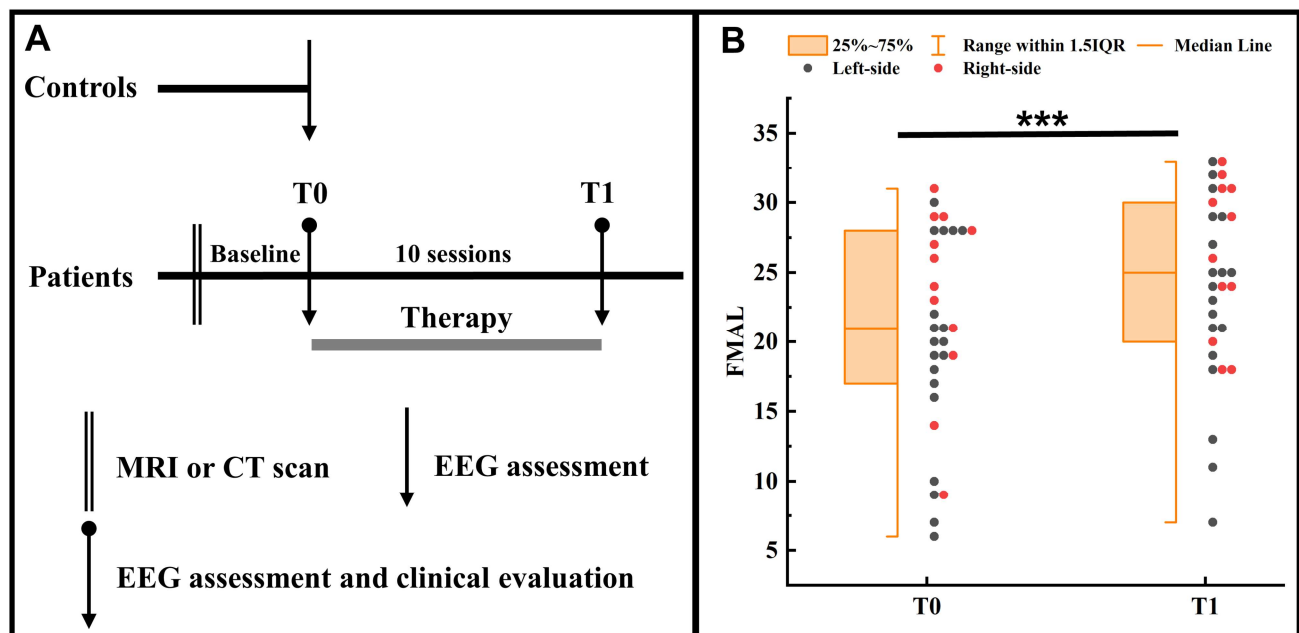

**Supplementary Figure 1.** Experimental setup. **(A)** Experiment timeline. Structural MRI or CT scans were acquired before the rehabilitation therapy. For stroke patients, EEG assessments and clinical evaluations were performed at baseline, then at end of 10 training sessions for all patients. EEG data were only acquired at baseline for healthy controls. **(B)** Stroke patients showed significant gains in lower-extremity motor ( $p < 0.001$ ). Left-side: patients with left-sided stroke; Right-side: patients with right-sided stroke.



### Microstate-wise FC

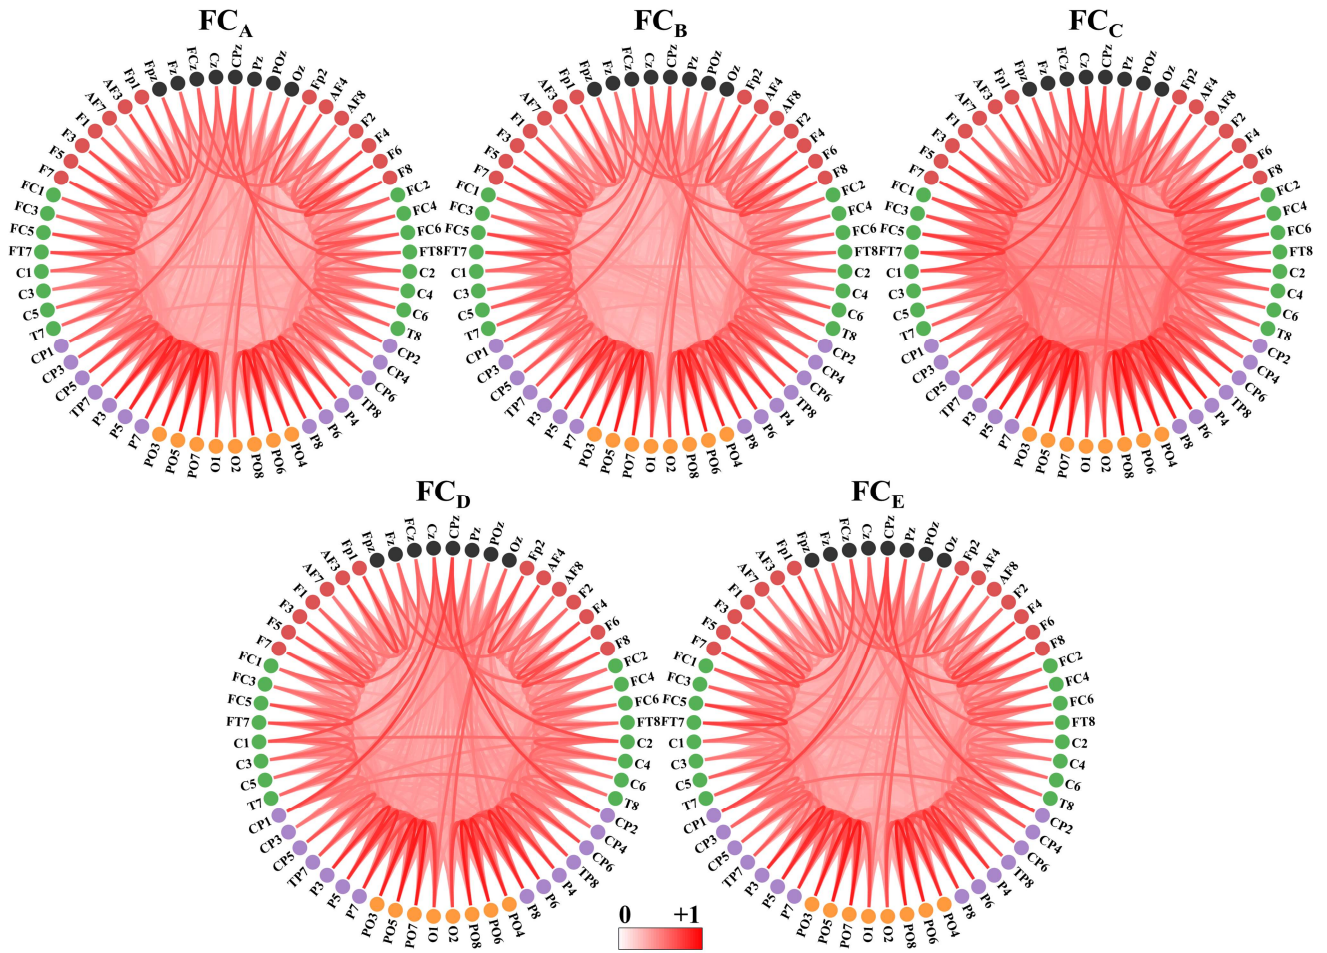

**Supplementary Figure 2. Microstate-wise functional connectivity.** Color depth indicates the strength of the functional connectivity. FC<sub>X</sub>: functional connectivity of microstate X.

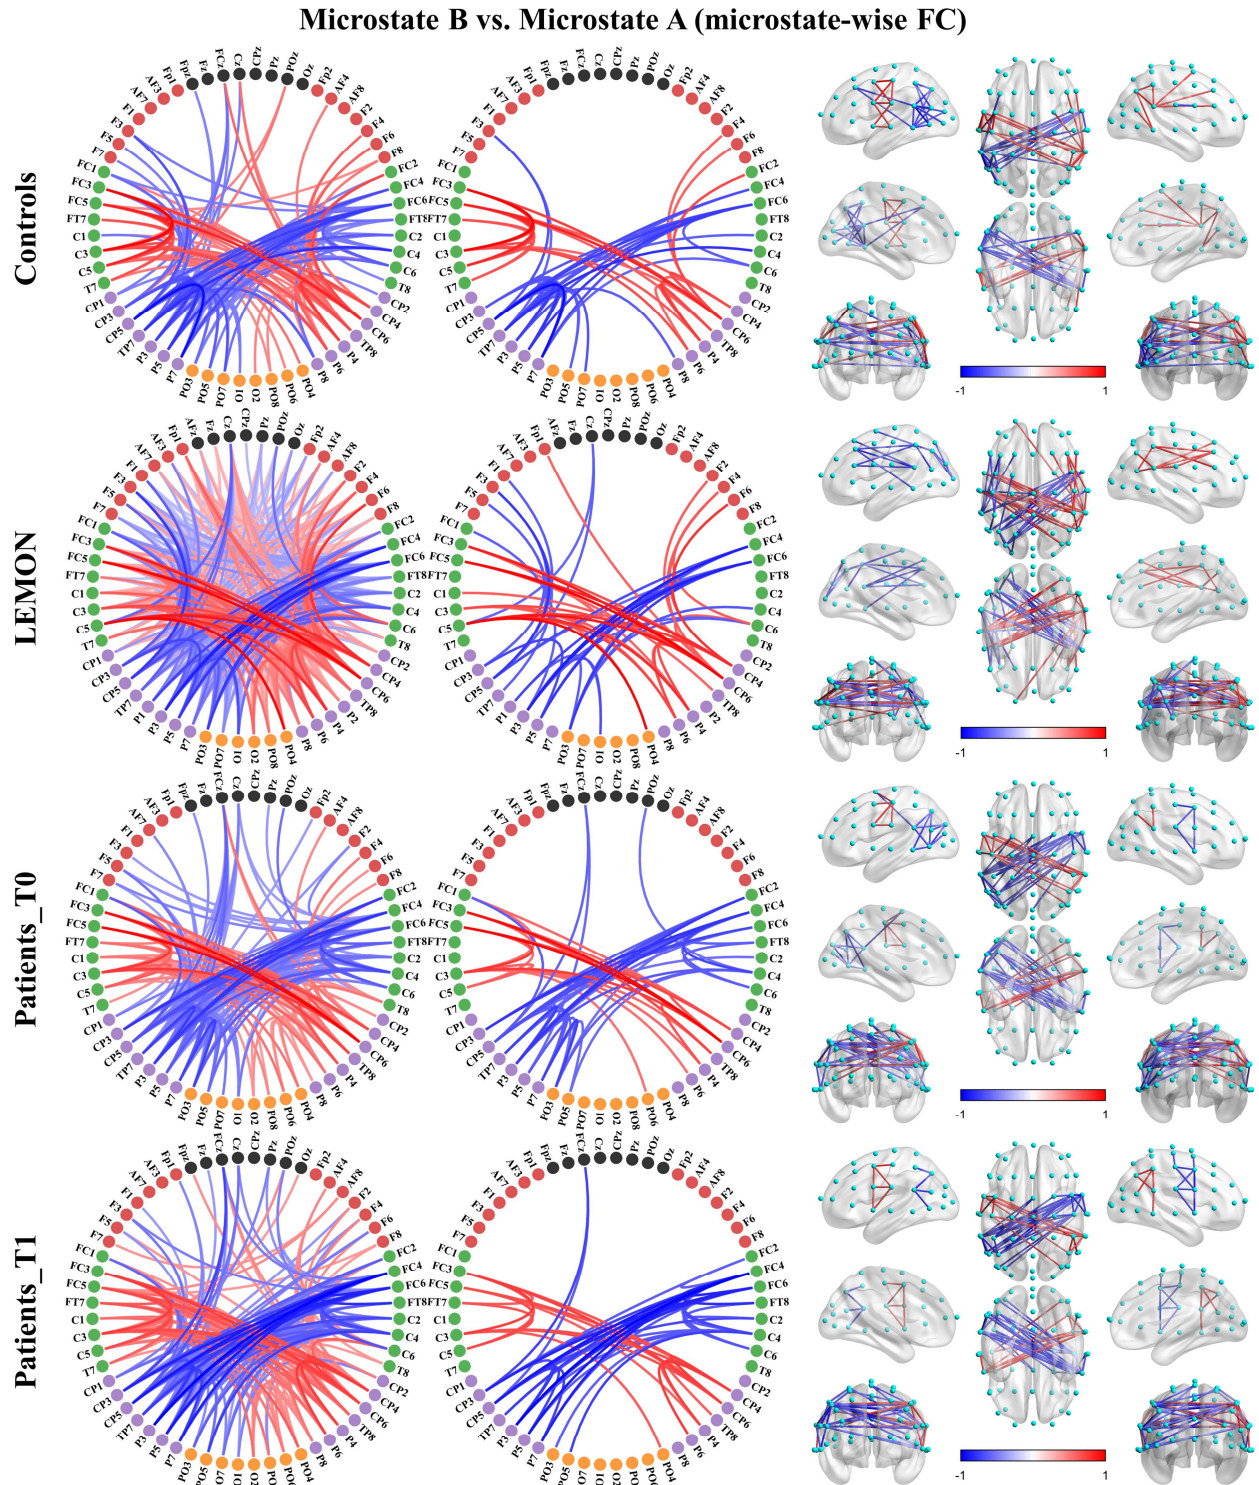

**Supplementary Figure 3. Results of  $FC_B$  versus  $FC_A$  for four groups.** The red color indicates greater connectivity for microstate B versus microstate A, while the blue color indicates the opposite pattern. Color depth indicates the size of the difference. Only the significant connected components are displayed. First column: original components; second and third columns: top 50 connections.

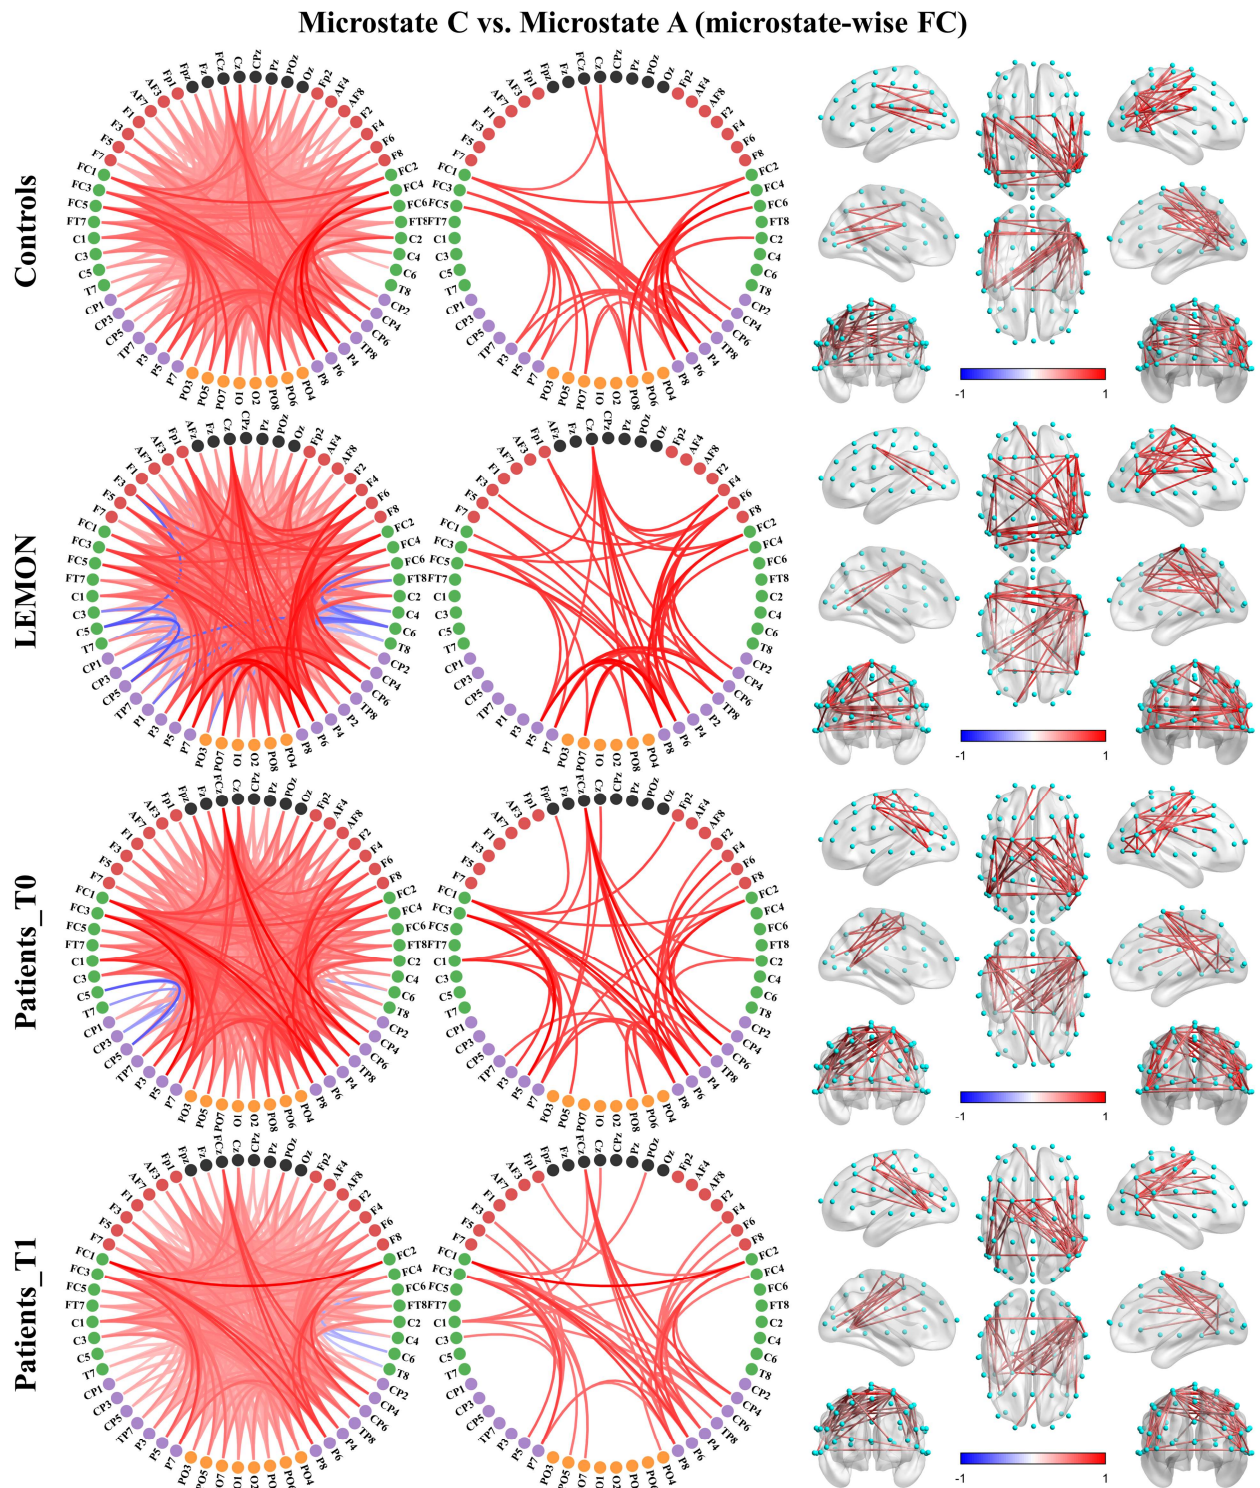

**Supplementary Figure 4. Results of  $F_{CC}$  versus  $F_{CA}$  for four groups.** The red color indicates greater connectivity for microstate C versus microstate A, while the blue color indicates the opposite pattern. Color depth indicates the size of the difference. Only the significant connected components are displayed. First column: original components; second and third columns: top 50 connections.

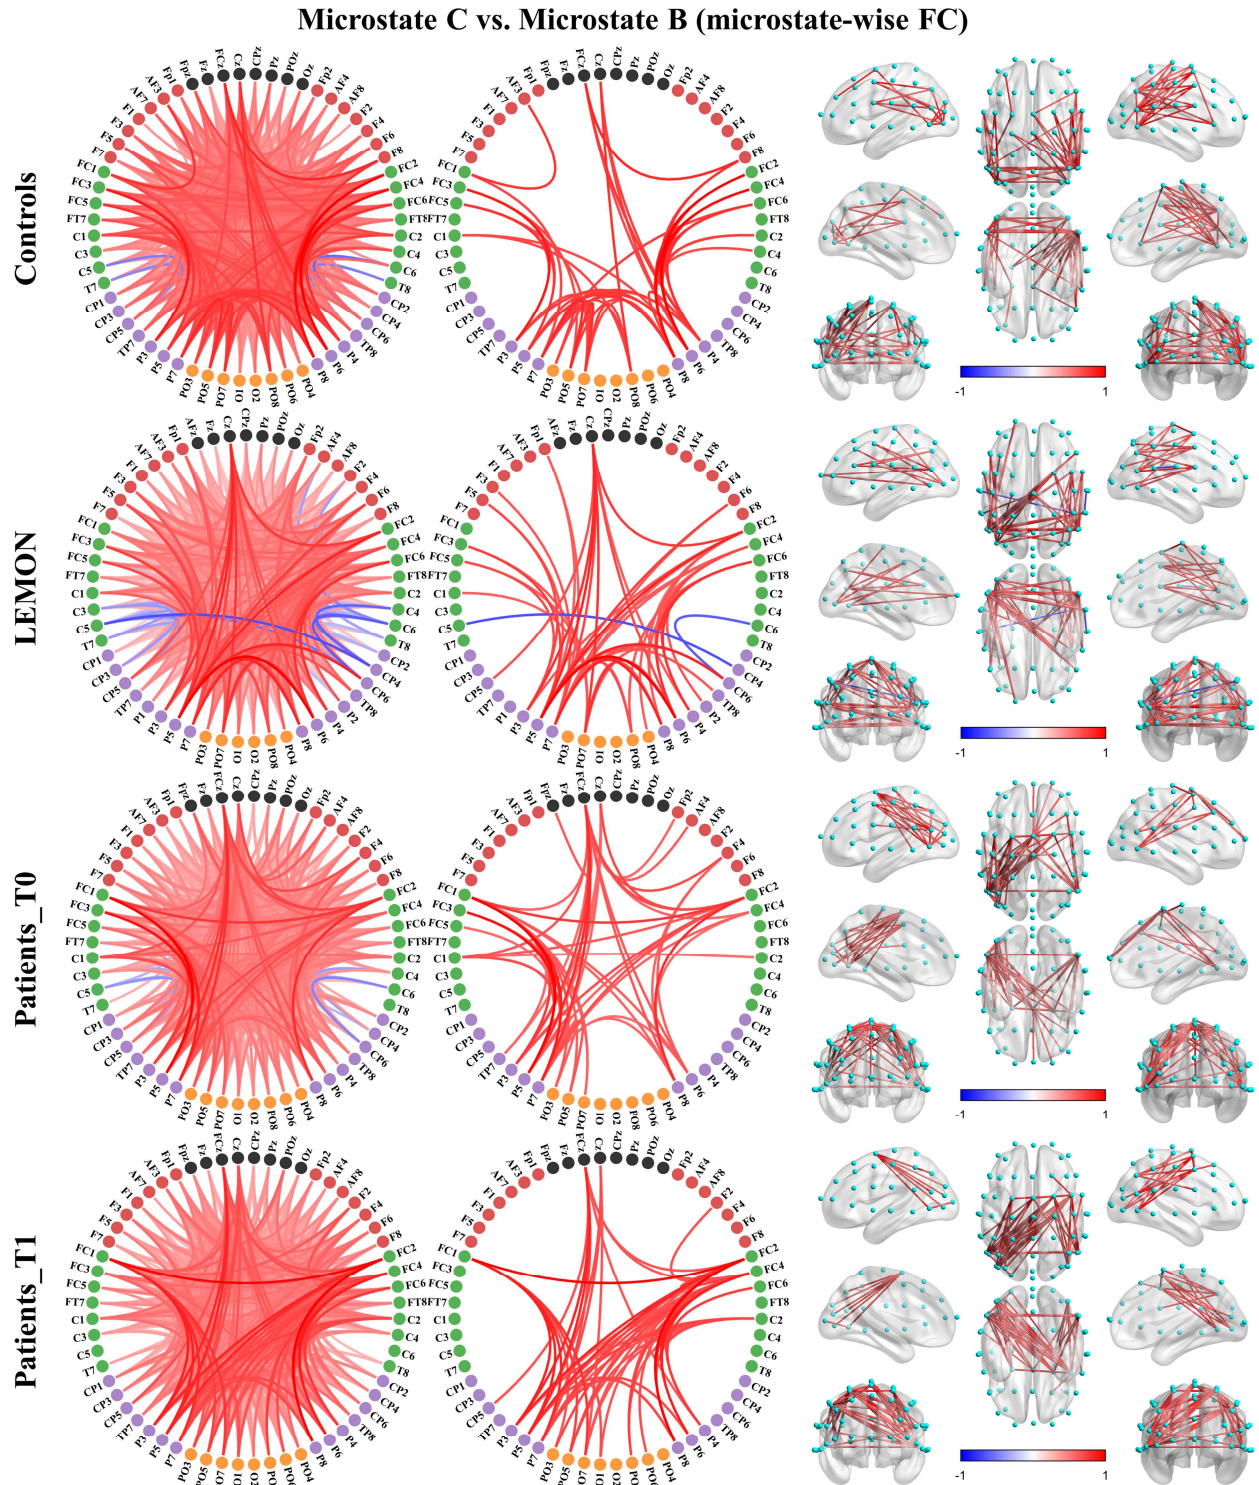

**Supplementary Figure 5. Results of  $FC_C$  versus  $FC_B$  for four groups.** The red color indicates greater connectivity for microstate C versus microstate B, while the blue color indicates the opposite pattern. Color depth indicates the size of the difference. Only the significant connected components are displayed. First column: original components; second and third columns: top 50 connections.

### Microstate D vs. Microstate A (microstate-wise FC)

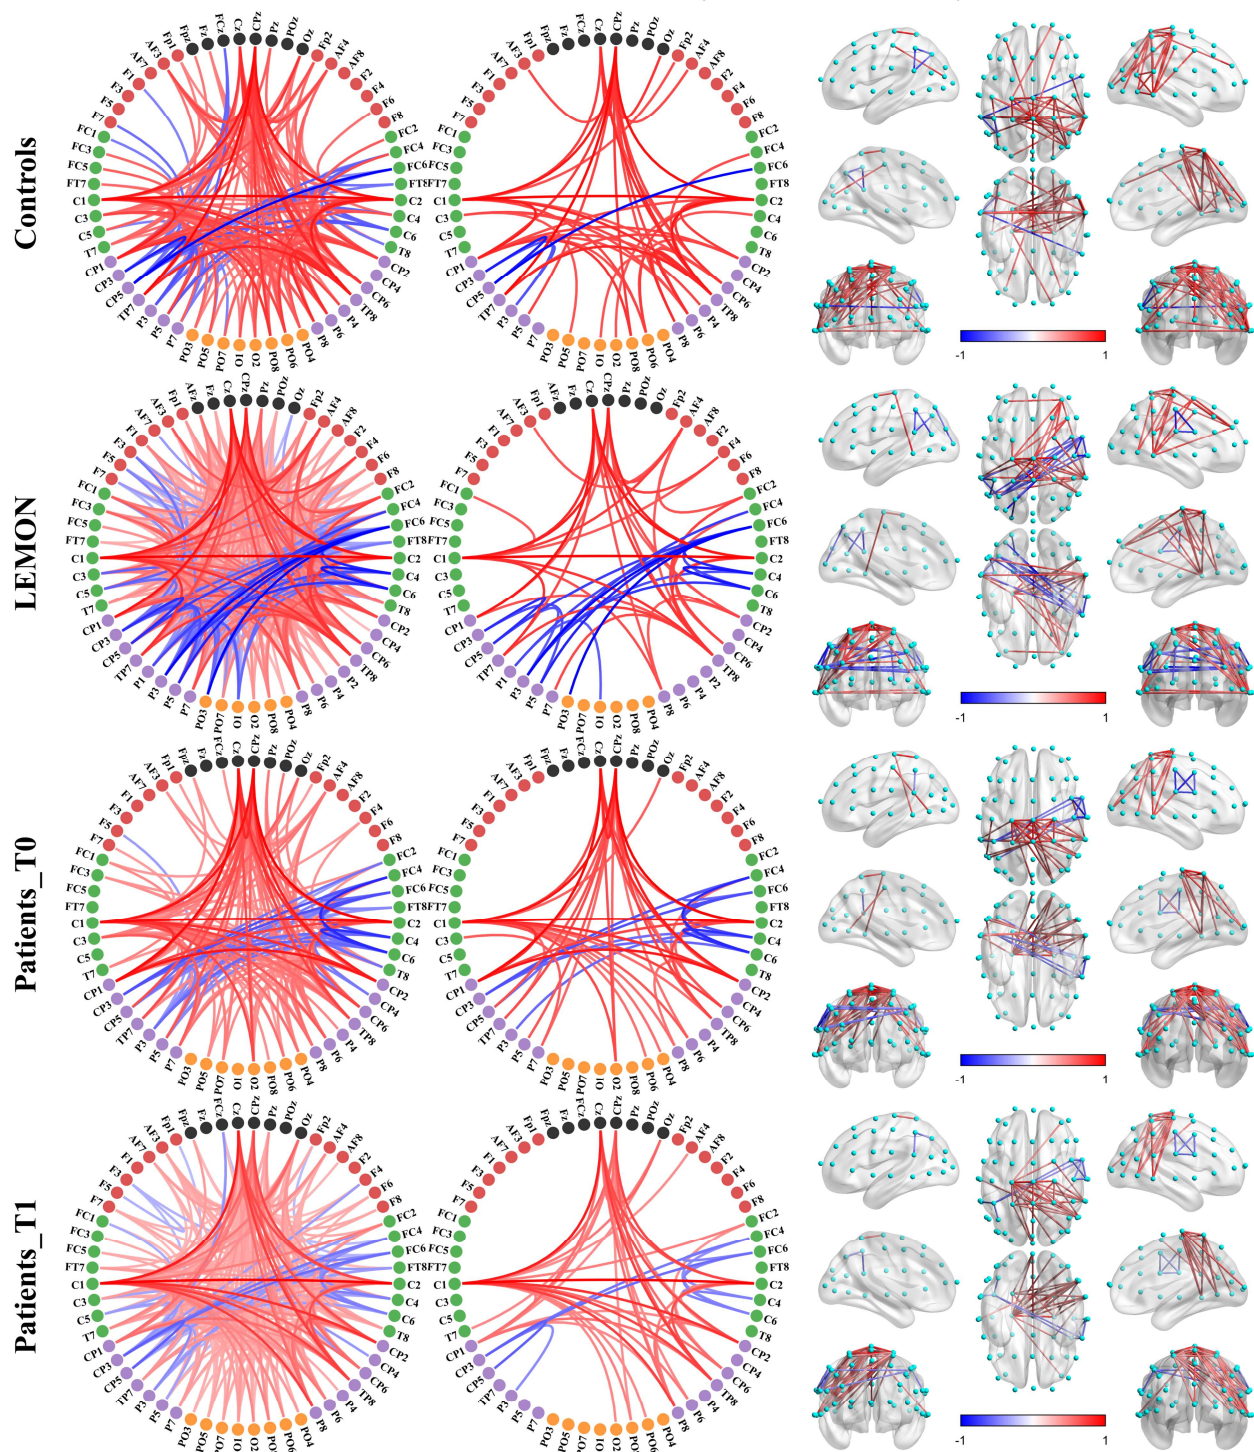

**Supplementary Figure 6. Results of  $FC_D$  versus  $FC_A$  for four groups.** The red color indicates greater connectivity for microstate D versus microstate A, while the blue color indicates the opposite pattern. Color depth indicates the size of the difference. Only the significant connected components are displayed. First column: original components; second and third columns: top 50 connections.

## Microstate D vs. Microstate B (microstate-wise FC)

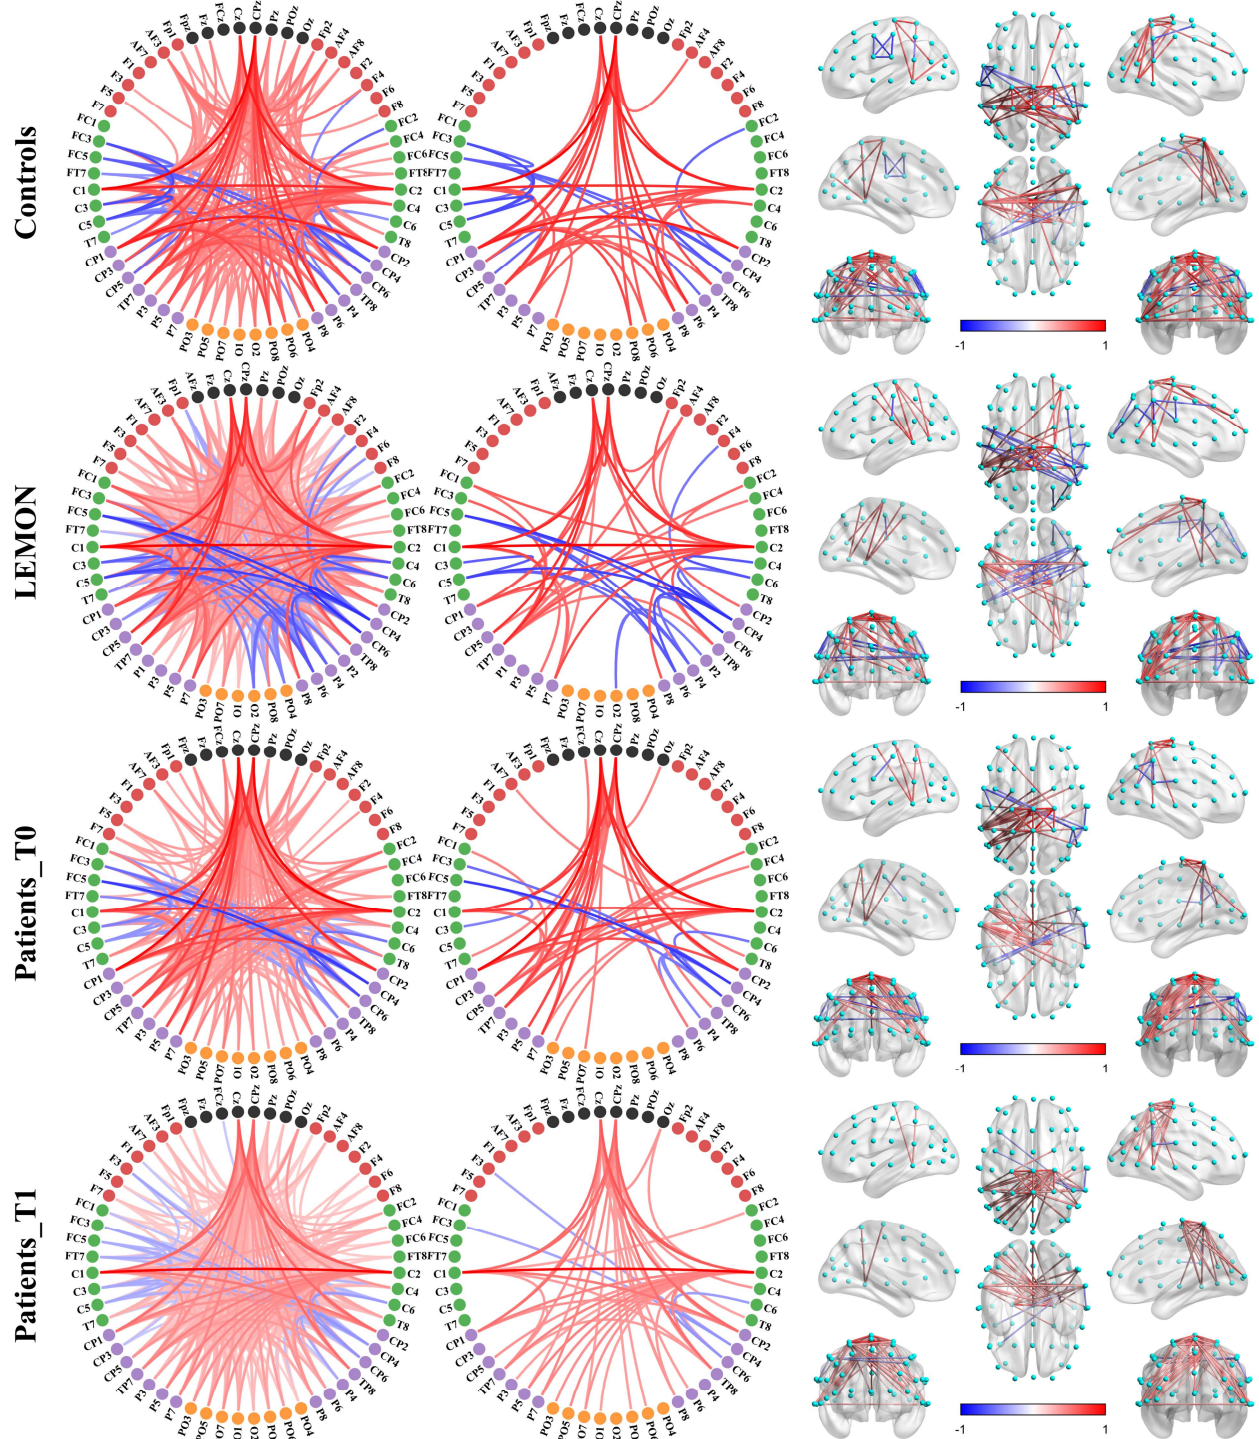

**Supplementary Figure 7. Results of  $FC_D$  versus  $FC_B$  for four groups.** The red color indicates greater connectivity for microstate D versus microstate B, while the blue color indicates the opposite pattern. Color depth indicates the size of the difference. Only the significant connected components are displayed. First column: original components; second and third columns: top 50 connections.

### Microstate D vs. Microstate C (microstate-wise FC)

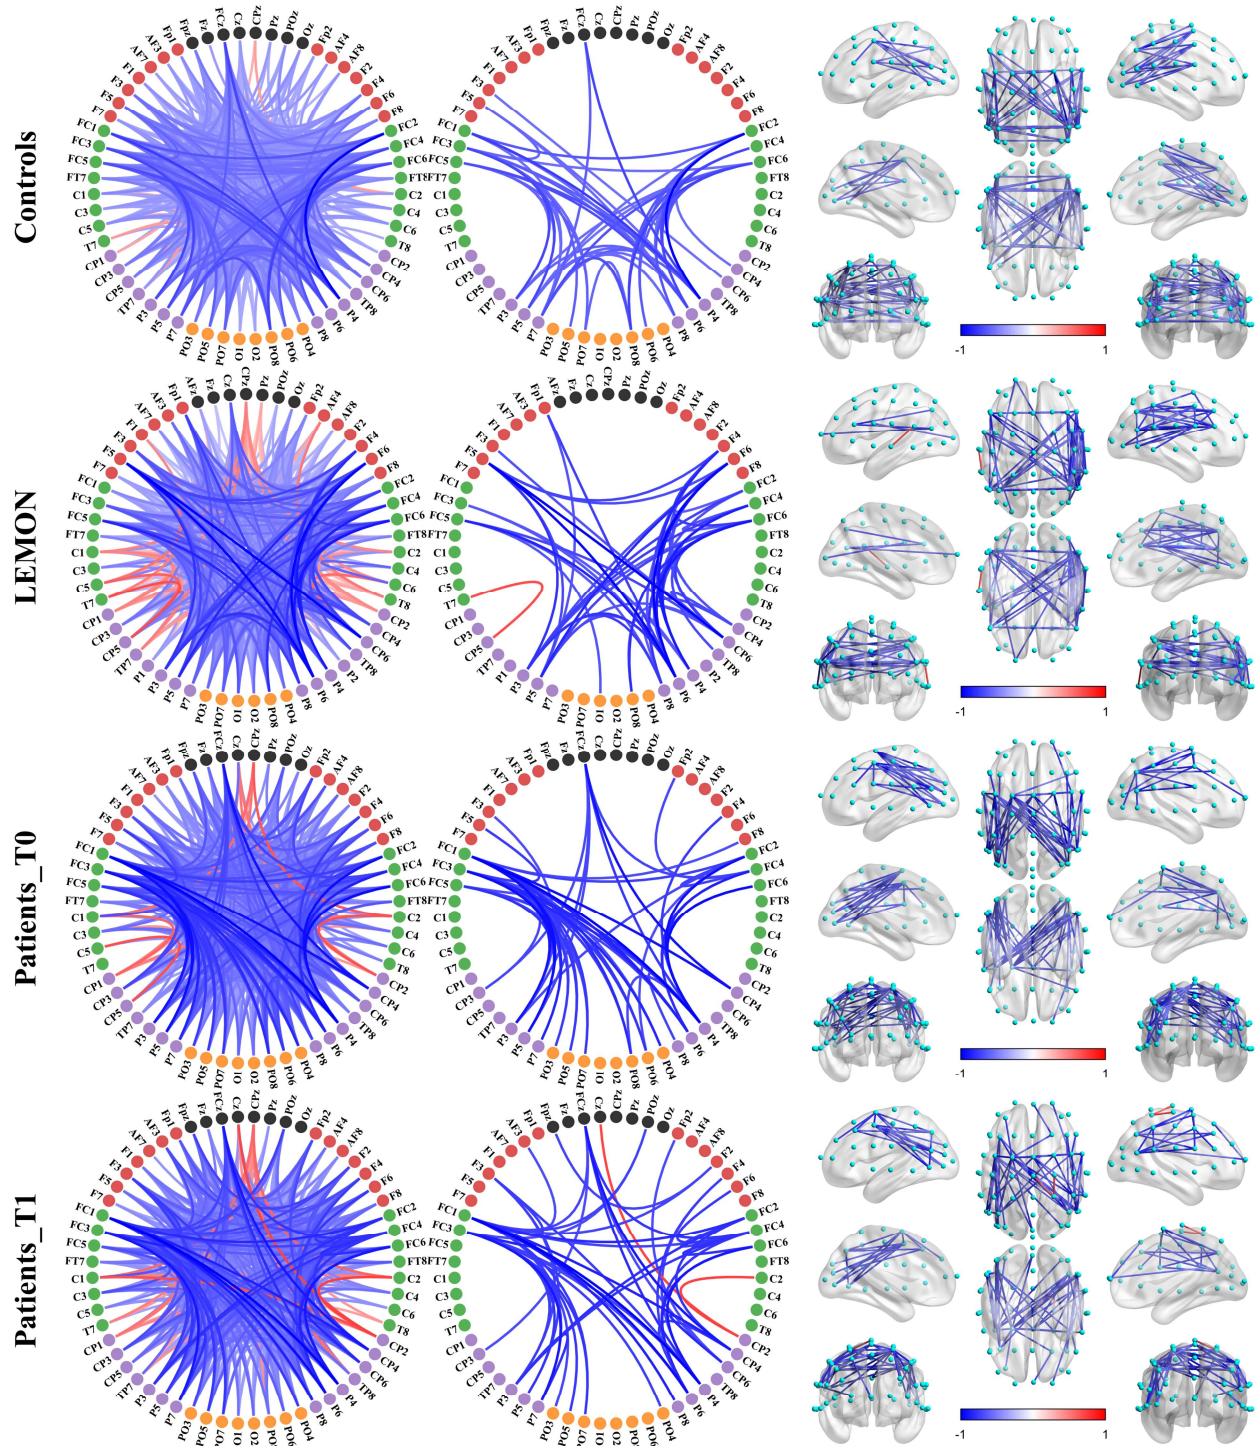

**Supplementary Figure 8. Results of  $FC_D$  versus  $FC_C$  for four groups.** The red color indicates greater connectivity for microstate D versus microstate C, while the blue color indicates the opposite pattern. Color depth indicates the size of the difference. Only the significant connected components are displayed. First column: original components; second and third columns: top 50 connections.

## Microstate E vs. Microstate A (microstate-wise FC)

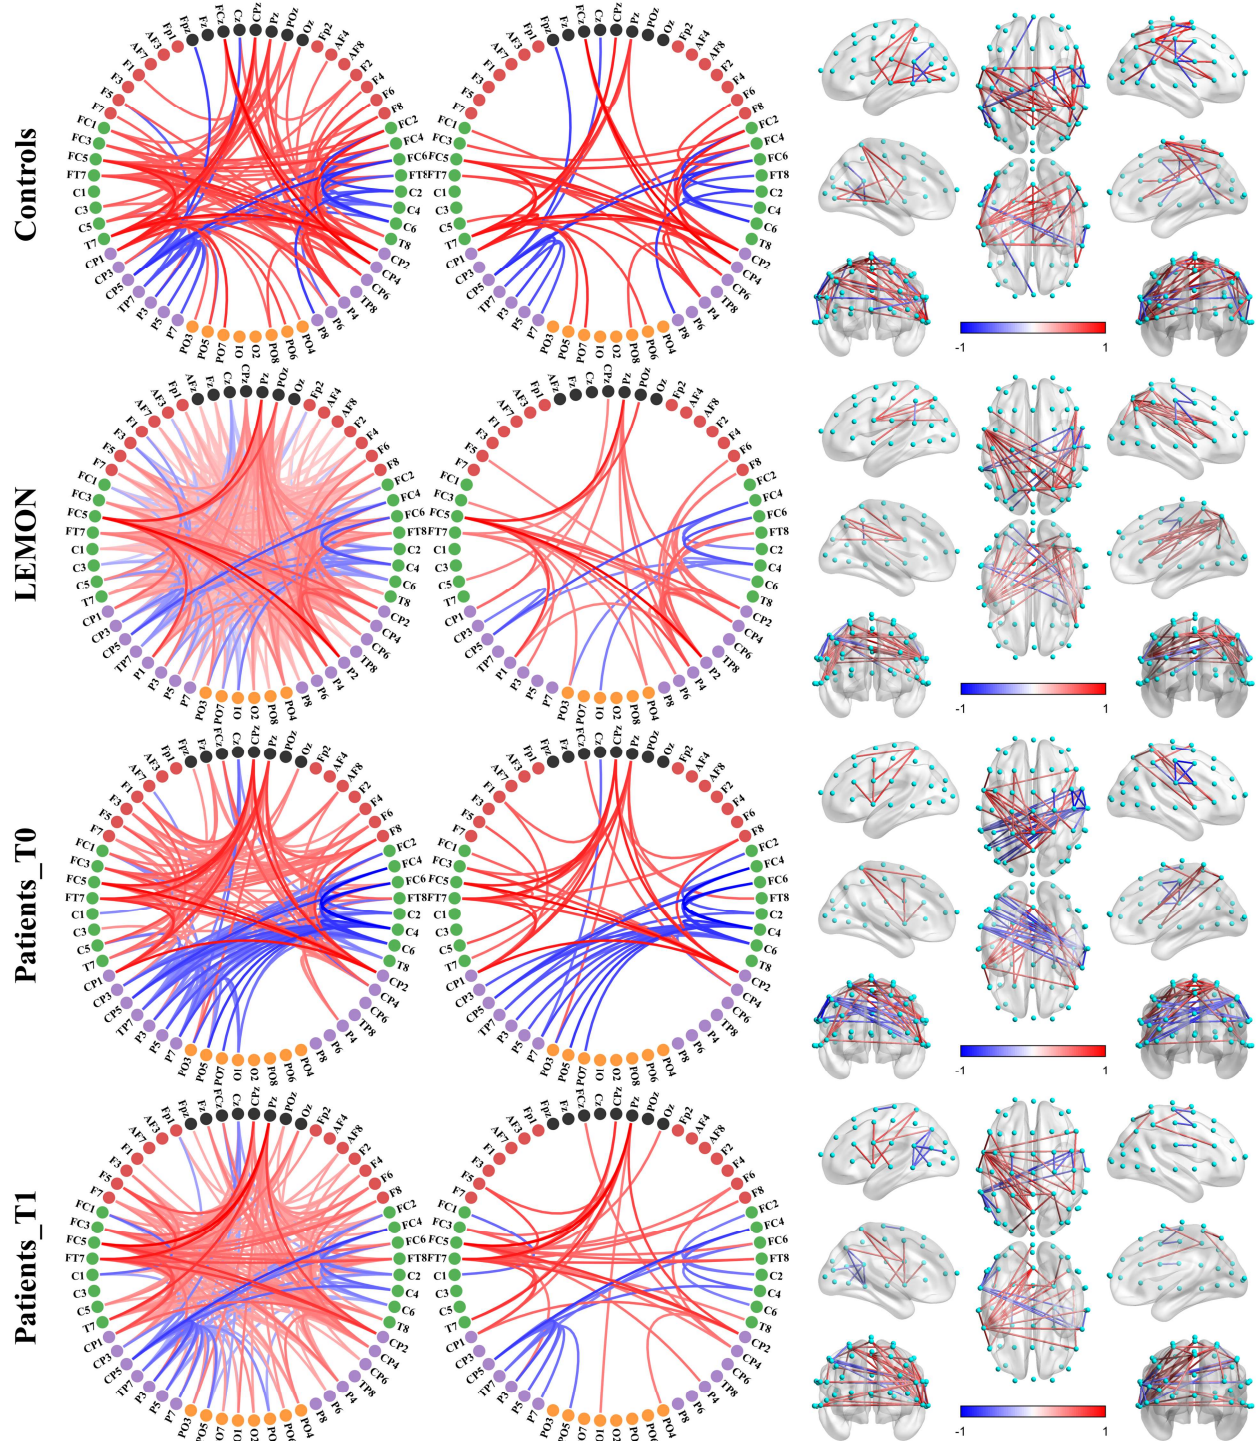

**Supplementary Figure 9. Results of  $FC_E$  versus  $FC_A$  for four groups.** The red color indicates greater connectivity for microstate E versus microstate A, while the blue color indicates the opposite pattern. Color depth indicates the size of the difference. Only the significant connected components are displayed. First column: original components; second and third columns: top 50 connections.



### Microstate E vs. Microstate B (microstate-wise FC)

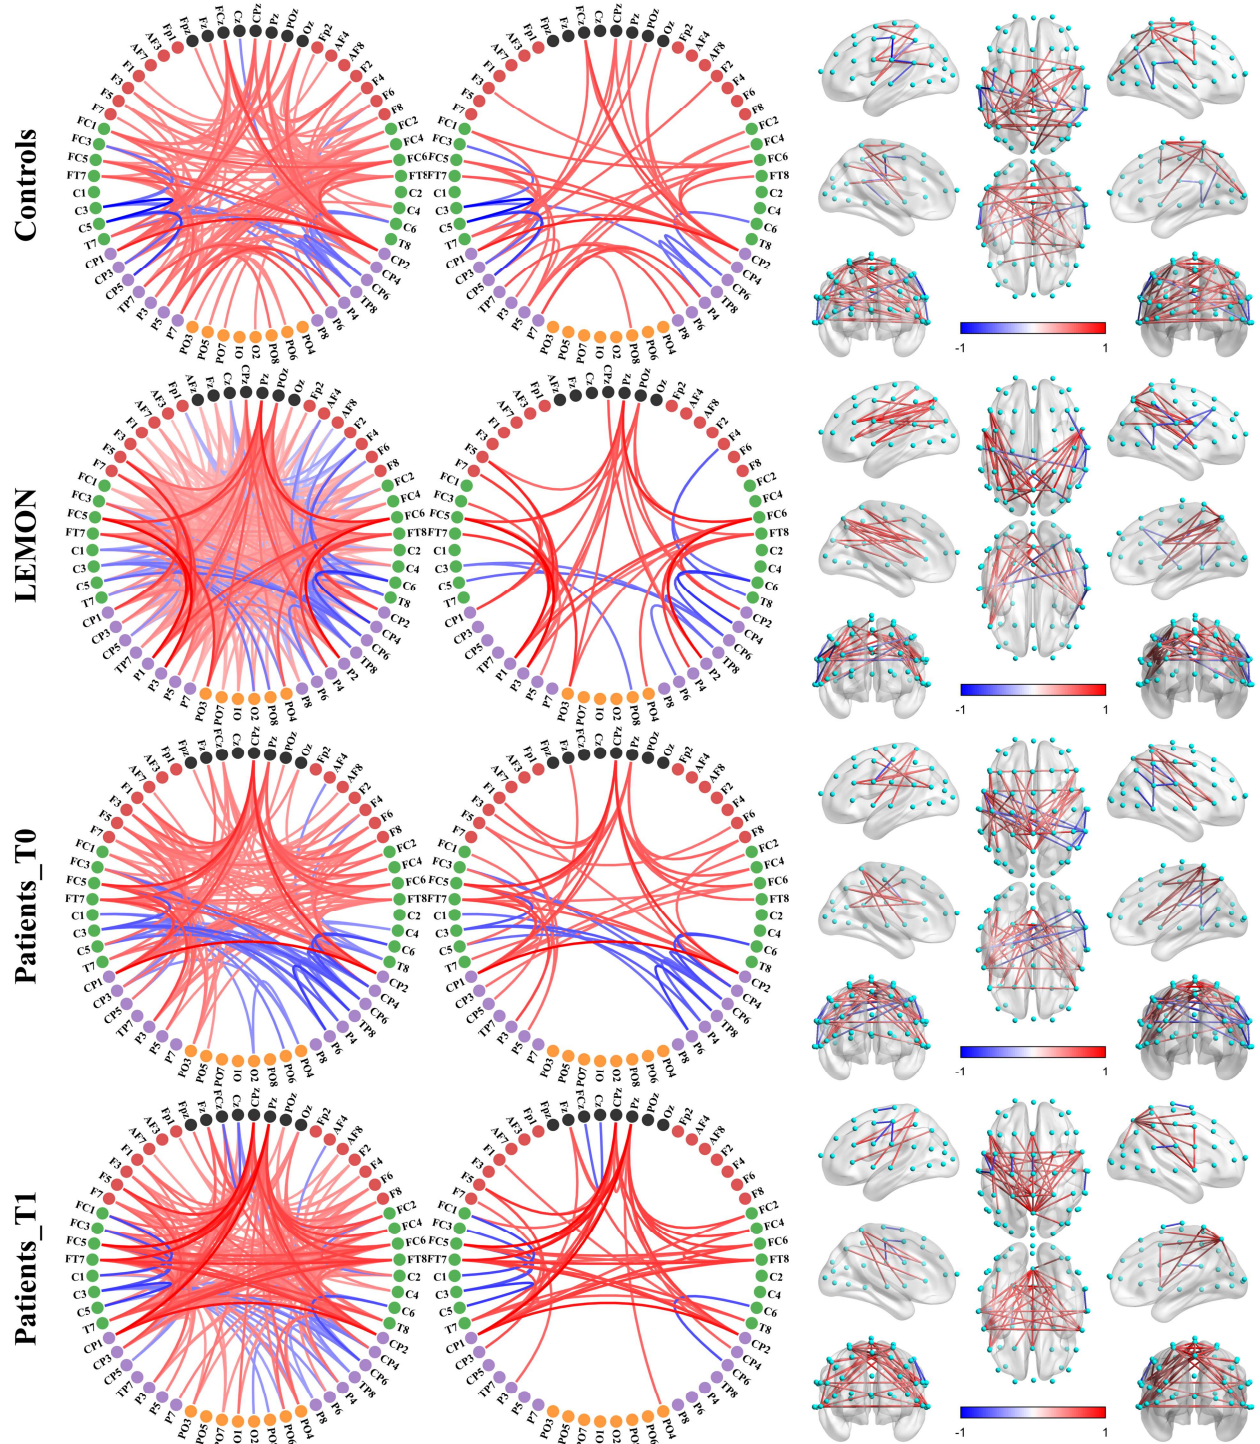

**Supplementary Figure 10. Results of  $FC_E$  versus  $FC_B$  for four groups.** The red color indicates greater connectivity for microstate E versus microstate B, while the blue color indicates the opposite pattern. Color depth indicates the size of the difference. Only the significant connected components are displayed. First column: original components; second and third columns: top 50 connections.

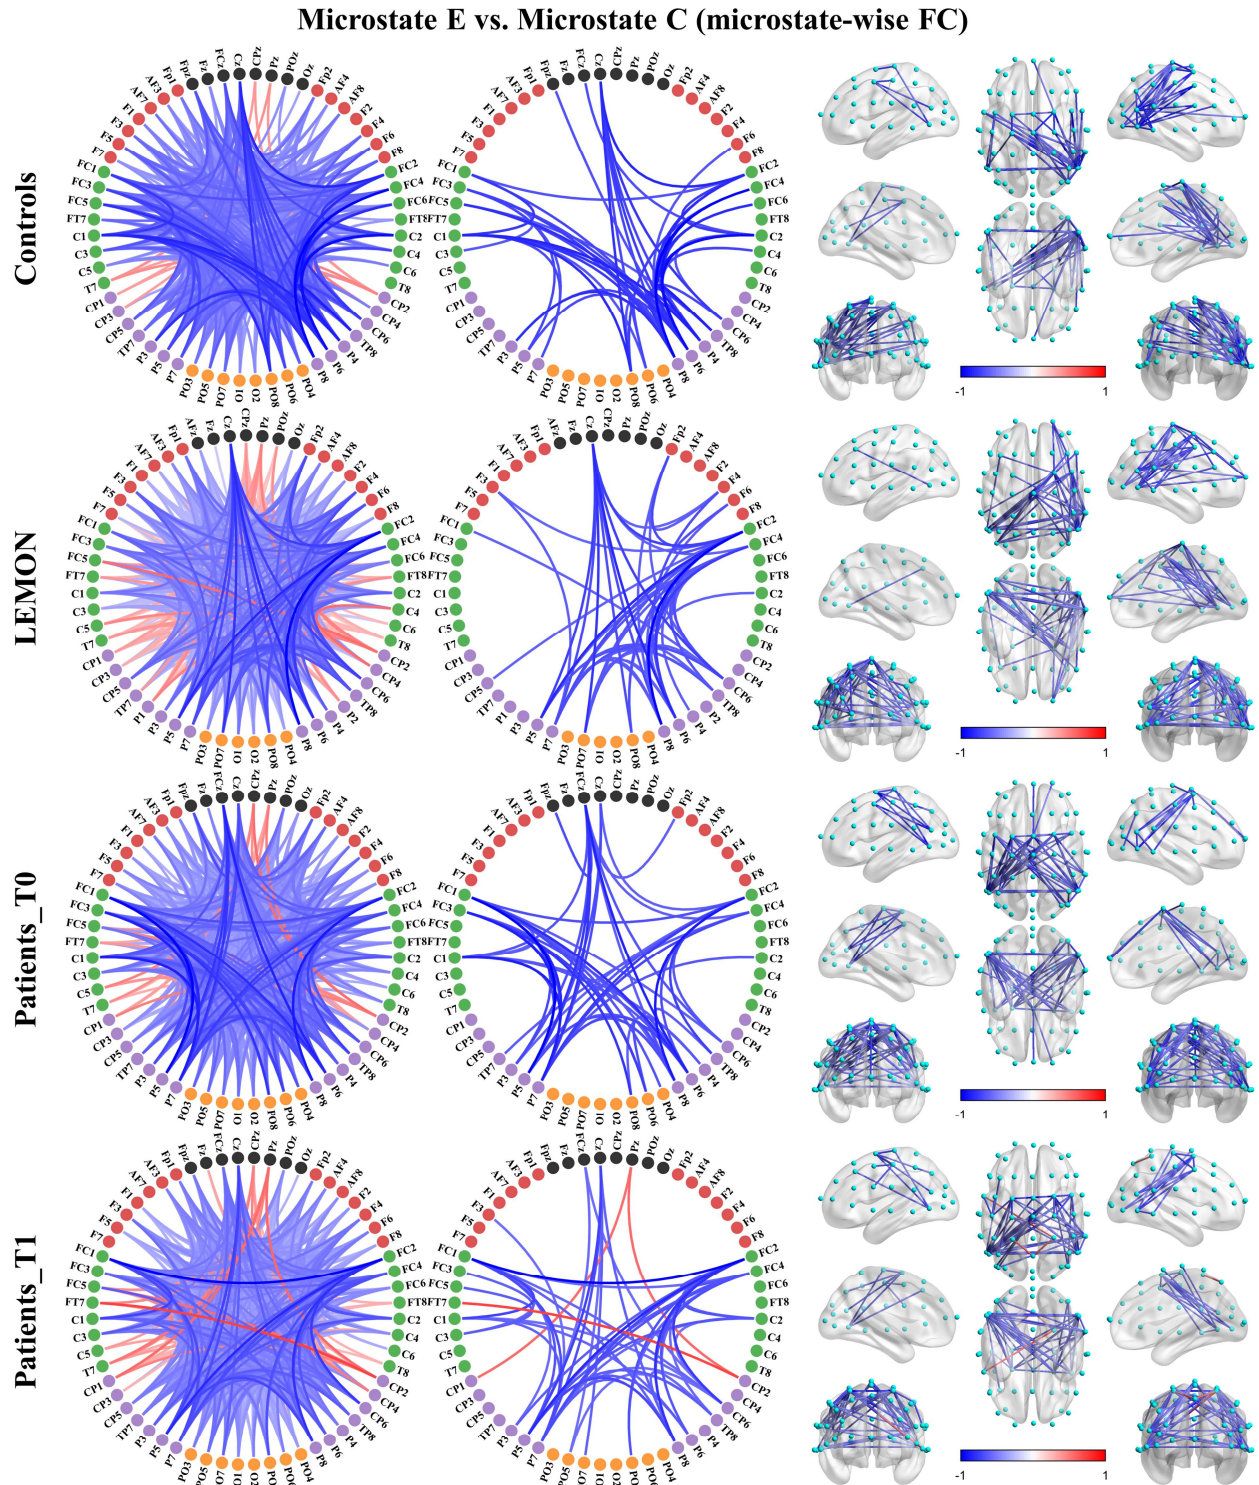

**Supplementary Figure 11. Results of  $FC_E$  versus  $FC_C$  for four groups.** The red color indicates greater connectivity for microstate E versus microstate C, while the blue color indicates the opposite pattern. Color depth indicates the size of the difference. Only the significant connected components are displayed. First column: original components; second and third columns: top 50 connections.

### Microstate E vs. Microstate D (microstate-wise FC)

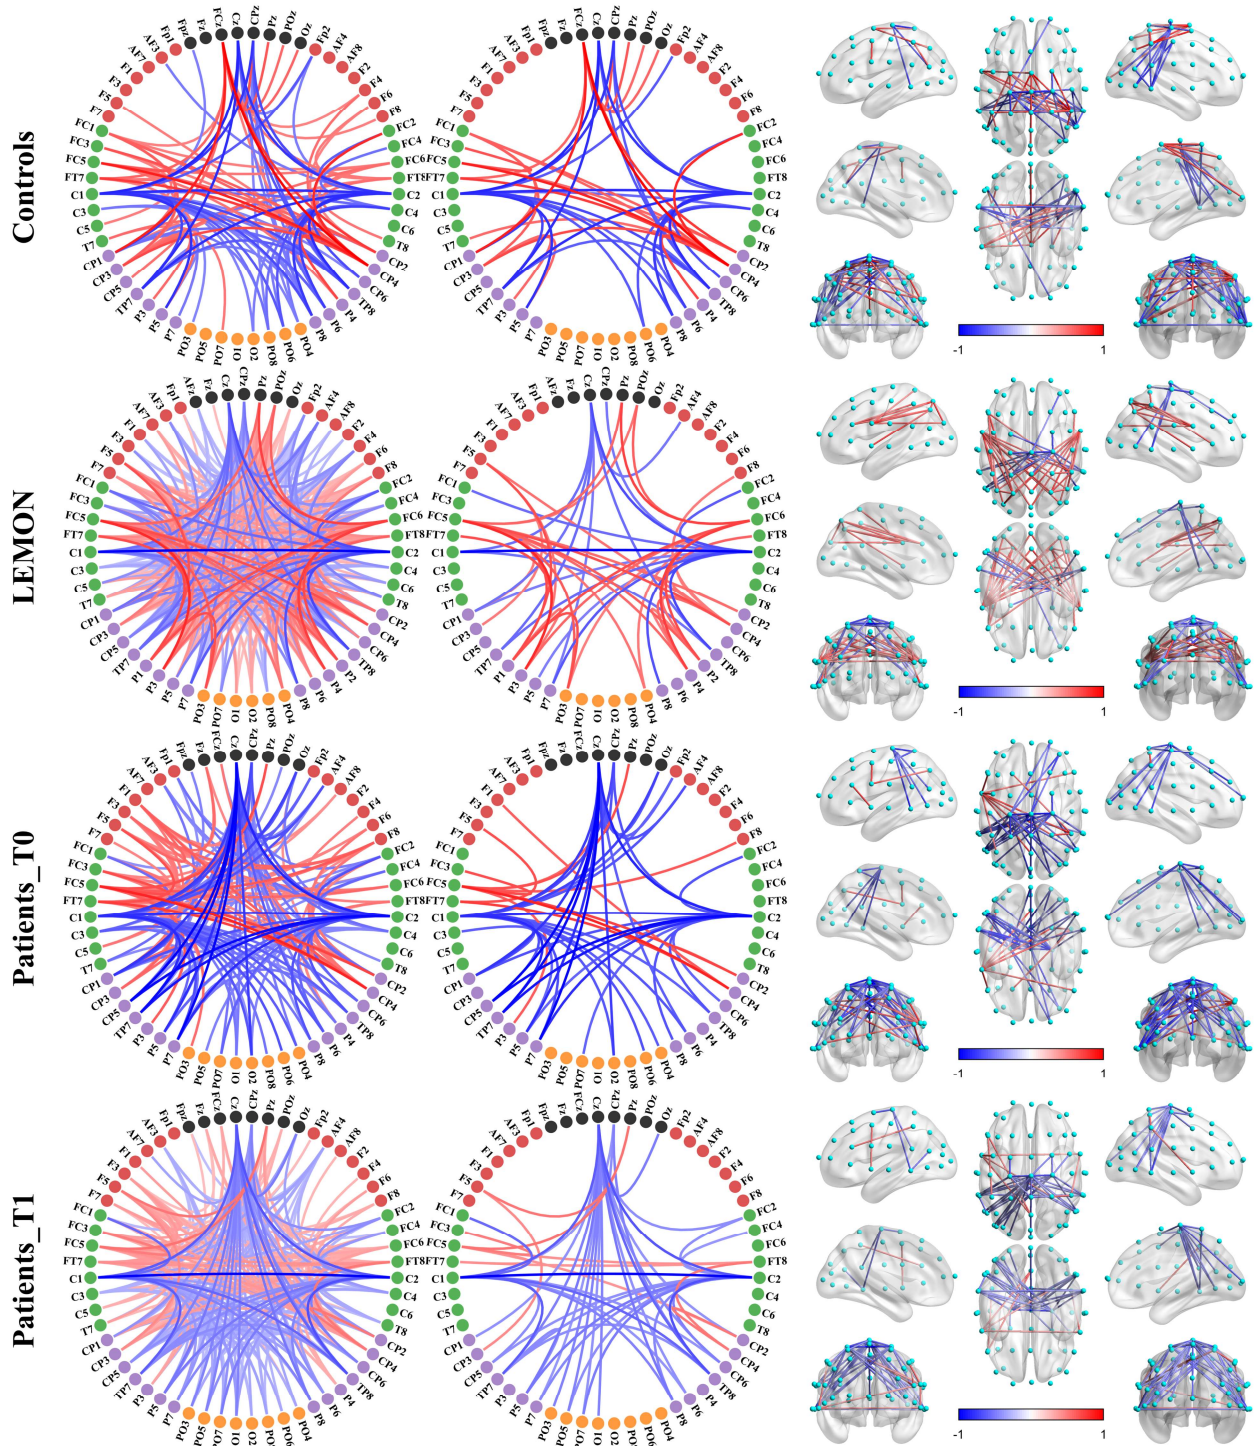

**Supplementary Figure 12. Results of  $FC_E$  versus  $FC_D$  for four groups.** The red color indicates greater connectivity for microstate E versus microstate D, while the blue color indicates the opposite pattern. Color depth indicates the size of the difference. Only the significant connected components are displayed. First column: original components; second and third columns: top 50 connections.

Patients\_left\_side\_stroke\_T0

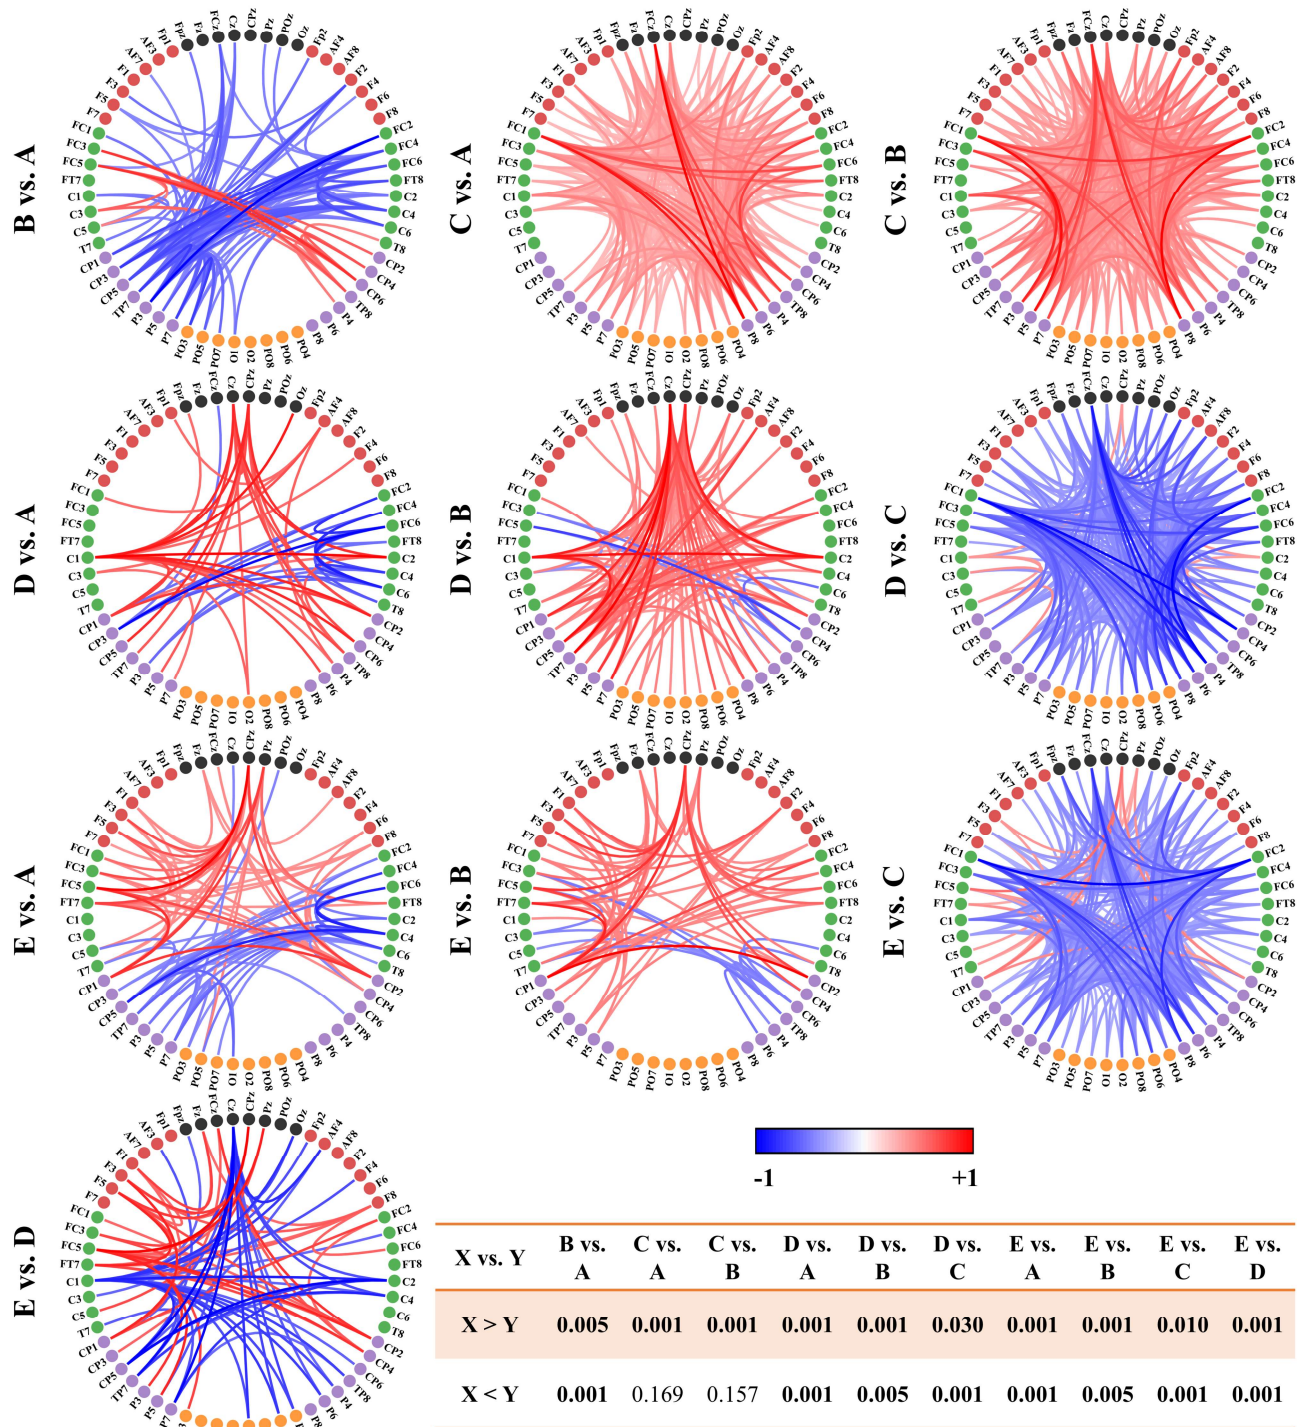

**Supplementary Figure 13. Results of microstate-wise functional connectivity comparisons for patients with left-sided stroke at T0.** For X vs. Y, the red color indicates  $X > Y$ , while the blue color indicates the opposite pattern. Color depth indicates the size of the difference. Only the significant connected components are displayed. *p*-values are also provided in the figure.

### Patients\_left\_side\_stroke\_T1

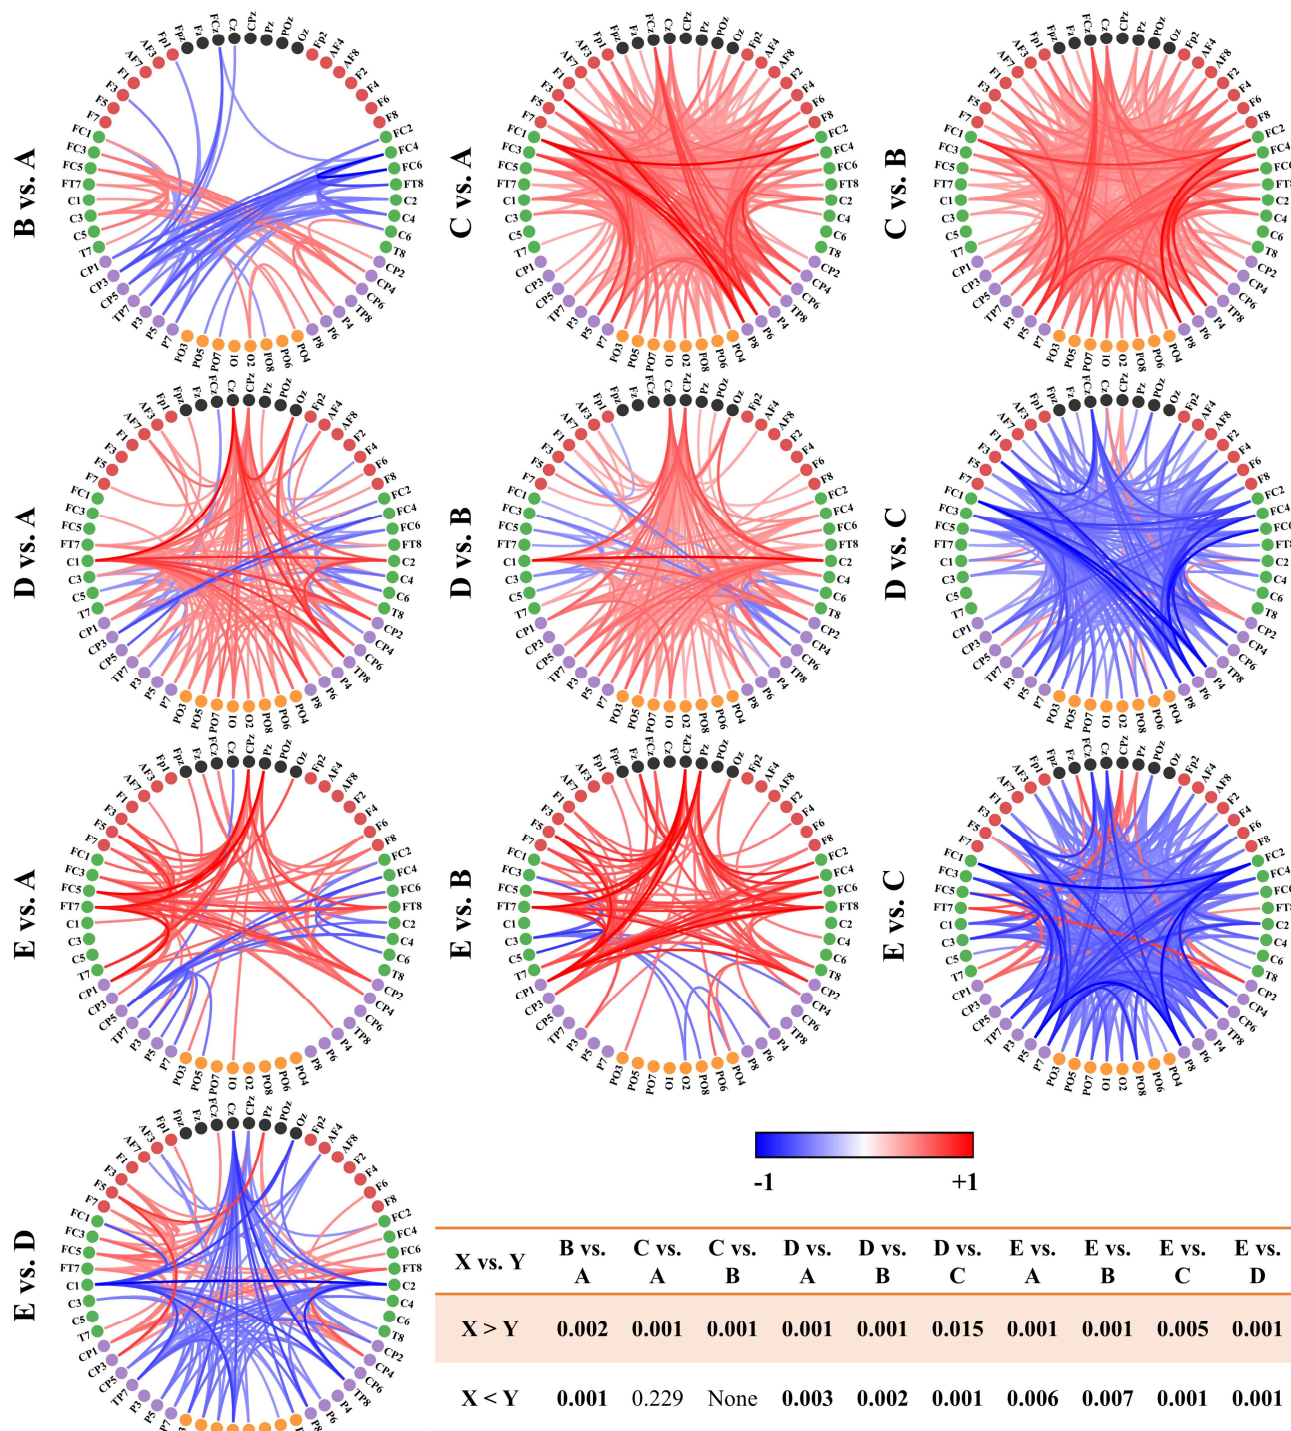

**Supplementary Figure 14. Results of microstate-wise functional connectivity comparisons for patients with left-sided stroke at T1.** For X vs. Y, the red color indicates  $X > Y$ , while the blue color indicates the opposite pattern. Color depth indicates the size of the difference. Only the significant connected components are displayed.  $p$ -values are also provided in the figure.

Patients\_right\_side\_stroke\_T0

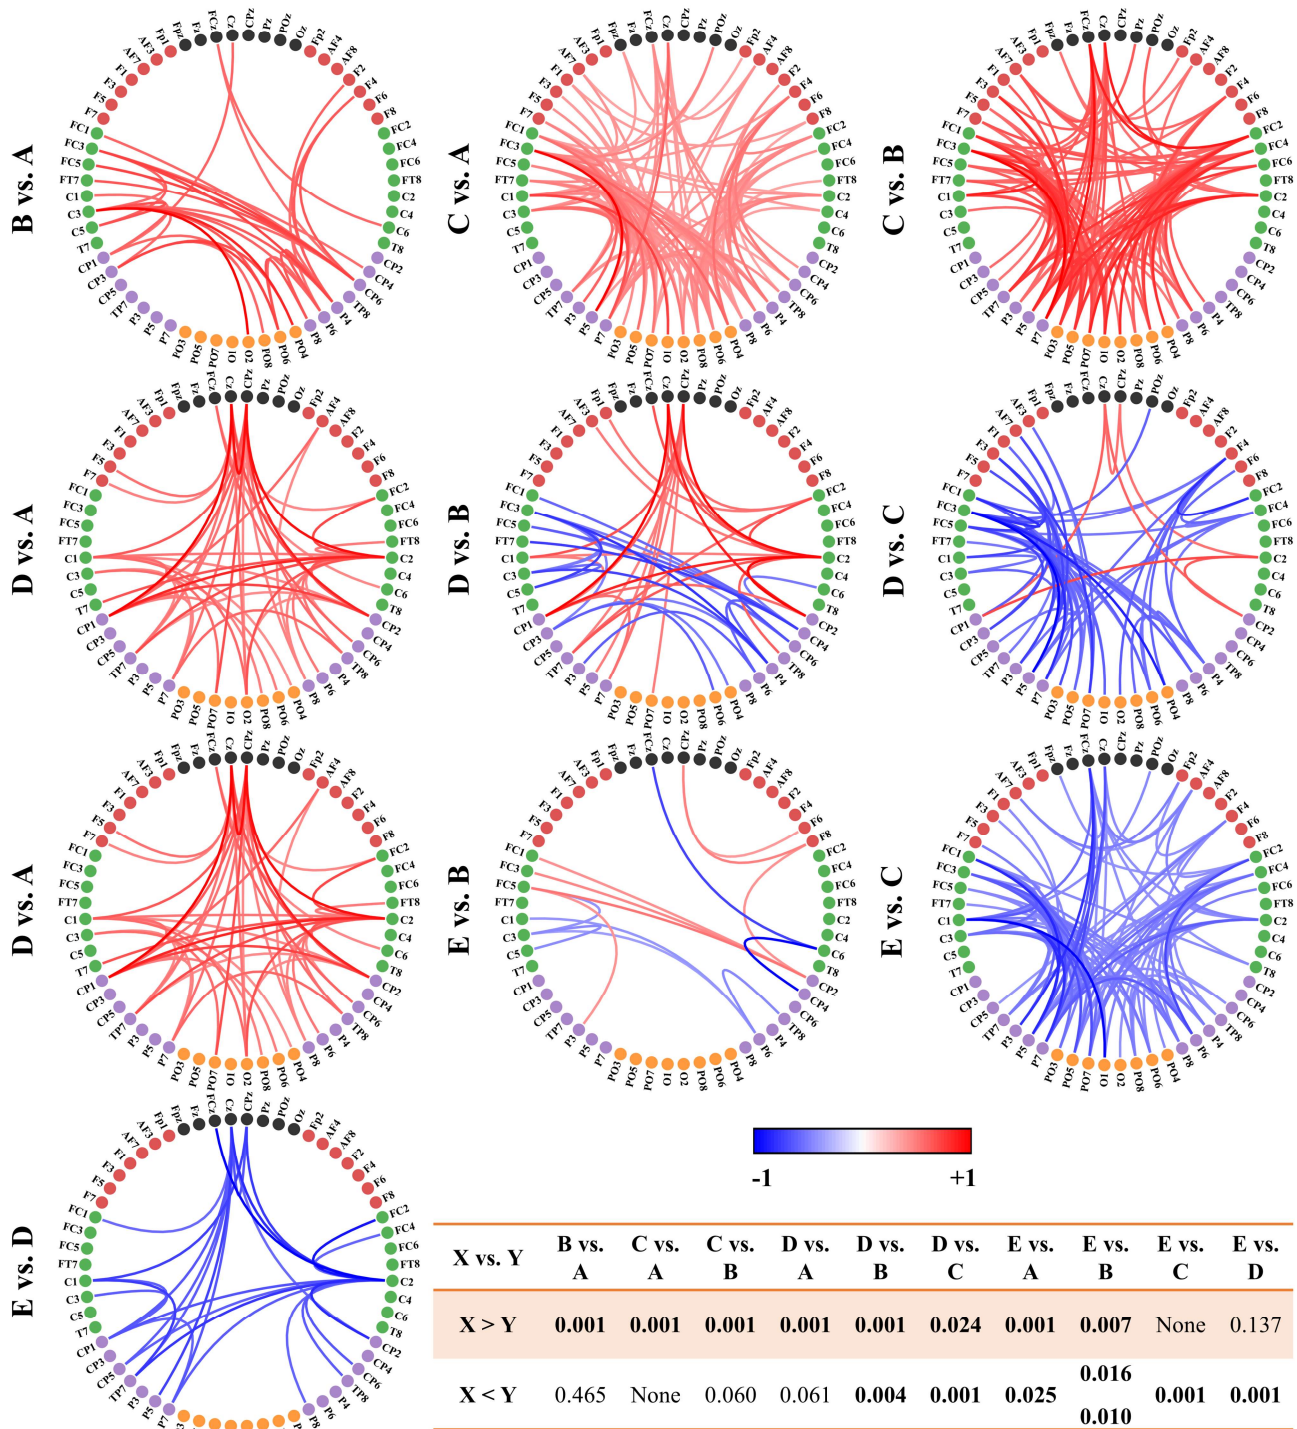

**Supplementary Figure 15. Results of microstate-wise functional connectivity comparisons for patients with right-sided stroke at T0.** For X vs. Y, the red color indicates  $X > Y$ , while the blue color indicates the opposite pattern. Color depth indicates the size of the difference. Only the significant connected components are displayed. *p*-values are also provided in the figure.

Patients\_right\_side\_stroke\_T1

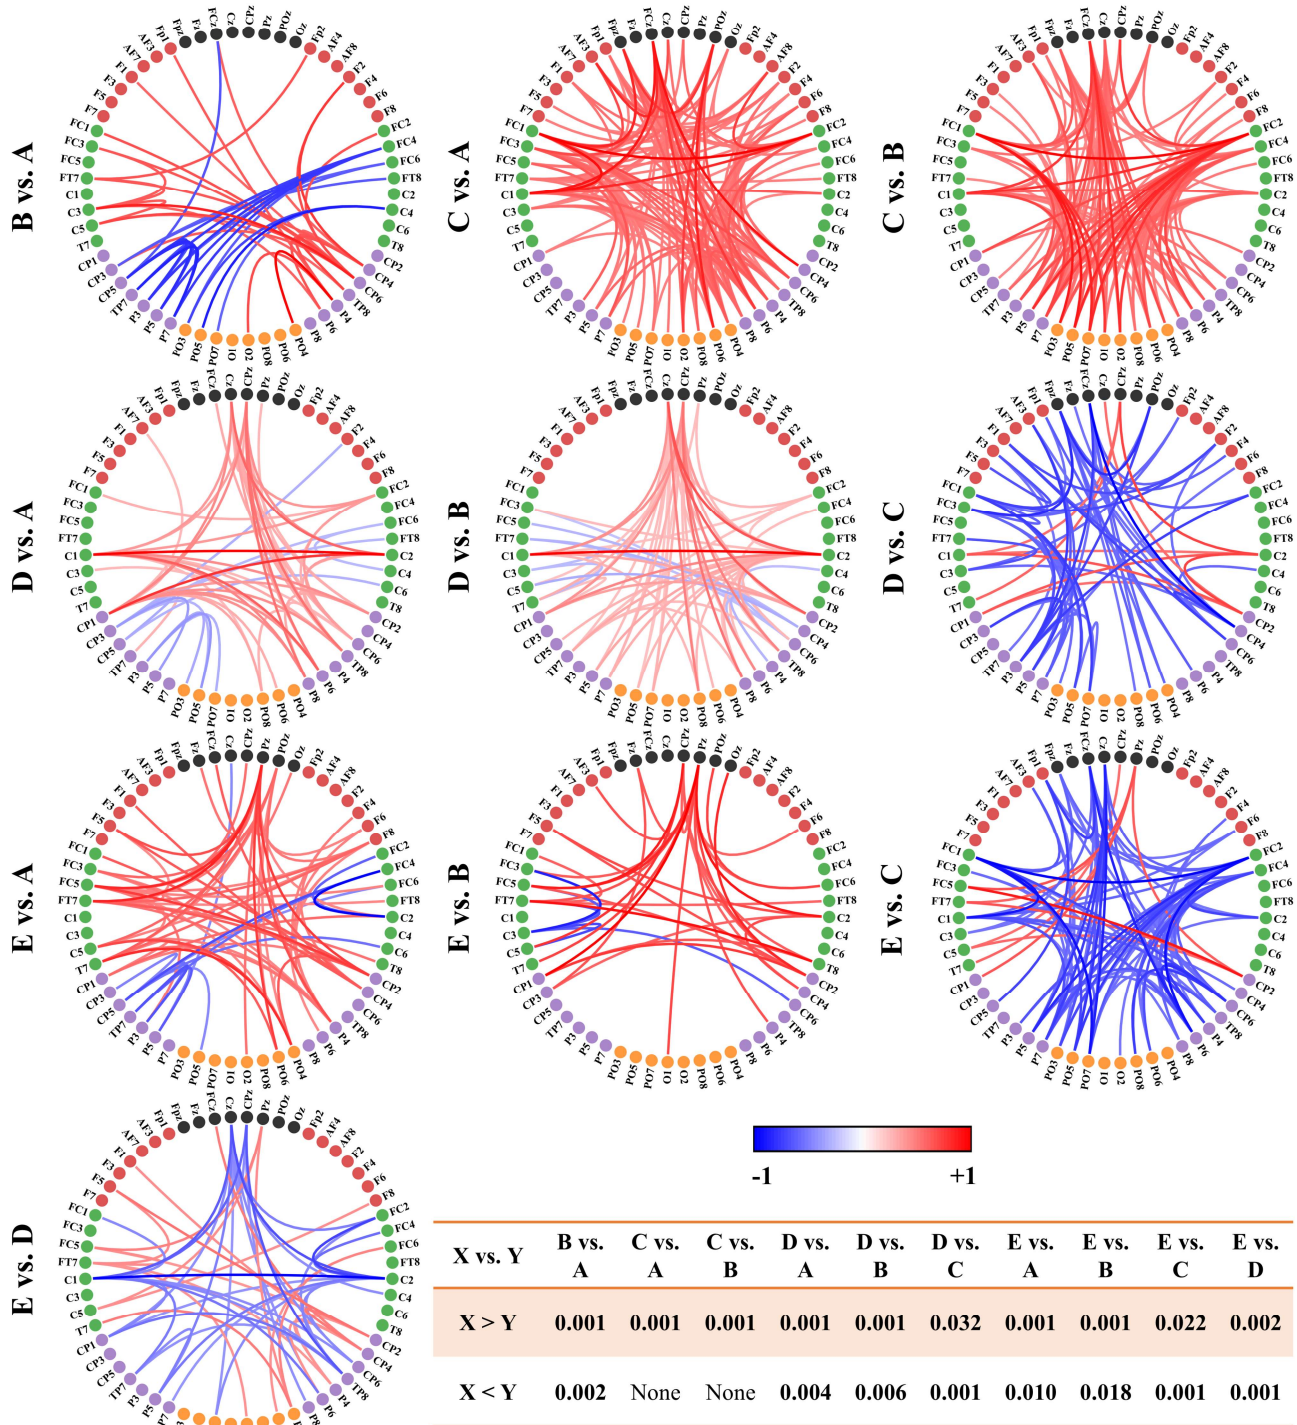

**Supplementary Figure 16. Results of microstate-wise functional connectivity comparisons for patients with right-sided stroke at T1.** For X vs. Y, the red color indicates  $X > Y$ , while the blue color indicates the opposite pattern. Color depth indicates the size of the difference. Only the significant connected components are displayed.  $p$ -values are also provided in the figure.

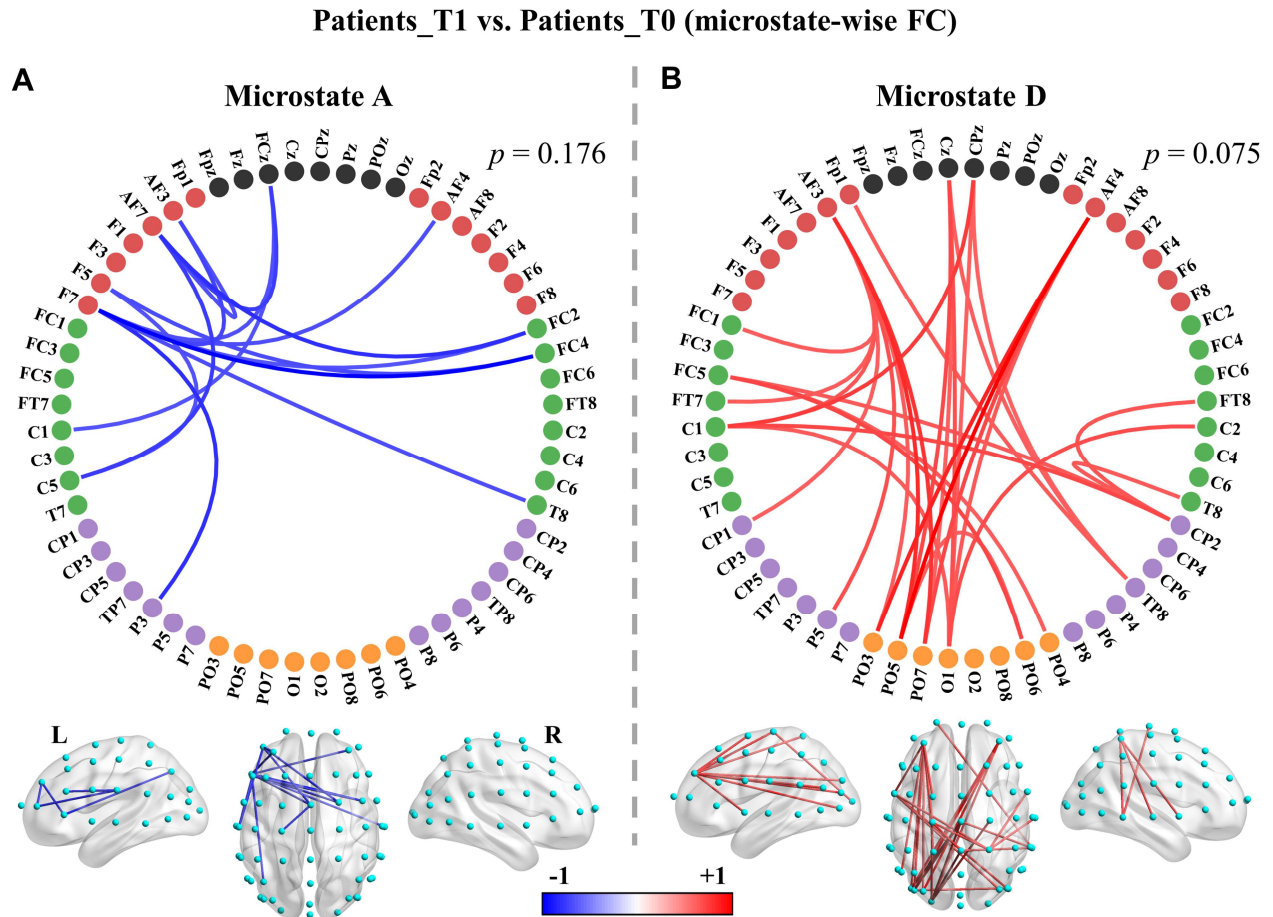

**Supplementary Figure 17. Microsite-wise functional connectivity differences between patients at T0 and T1.** (A) Patients at T0 versus Patients at T1 for functional connectivity of microstates A. (B) Patients at T0 versus Patients at T1 for functional connectivity of microstates D. For X versus Y, the red color indicates greater connectivity for X versus Y, and the blue color indicates greater connectivity for Y versus X. Color depth represents the size of the connection difference. For each comparison, the smallest  $p$ -value and corresponding connected component are provided.



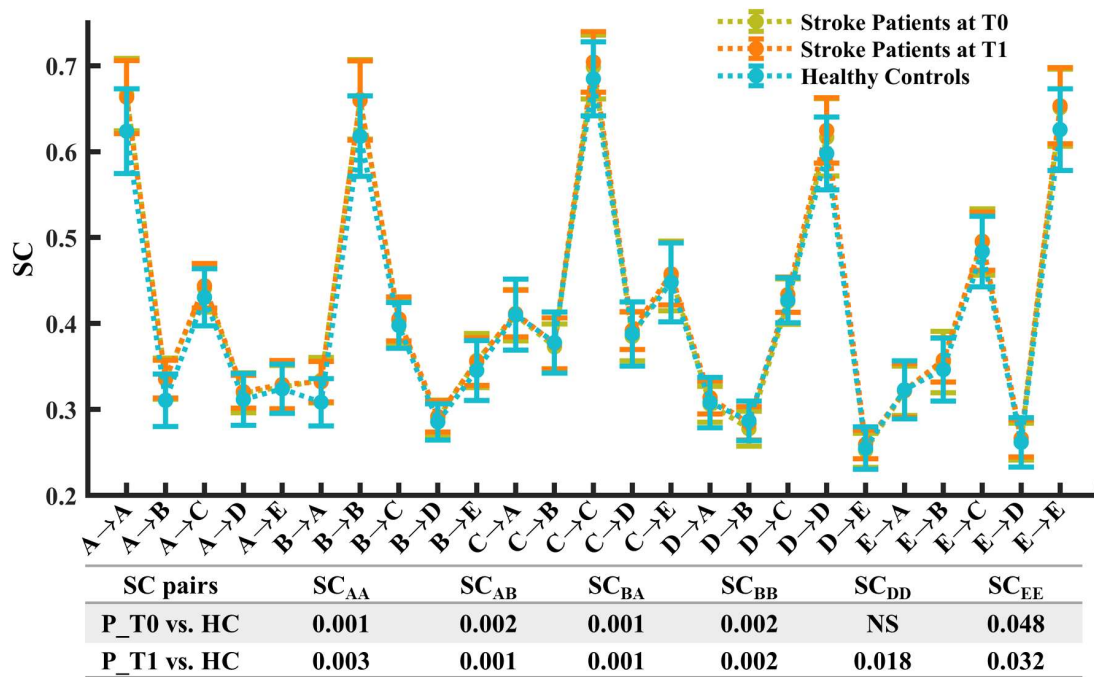

**Supplementary Figure 18. Results of comparisons between patients and healthy controls in SC.** For each group, a dashed line links the mean across all SC pairs. The standard deviation is also displayed for each SC pair. *p*-values of SC pairs with significant differences between patients and controls are provided (without Bonferroni-Holm correction). NS: nonsignificant, P: patients, HC: healthy controls.

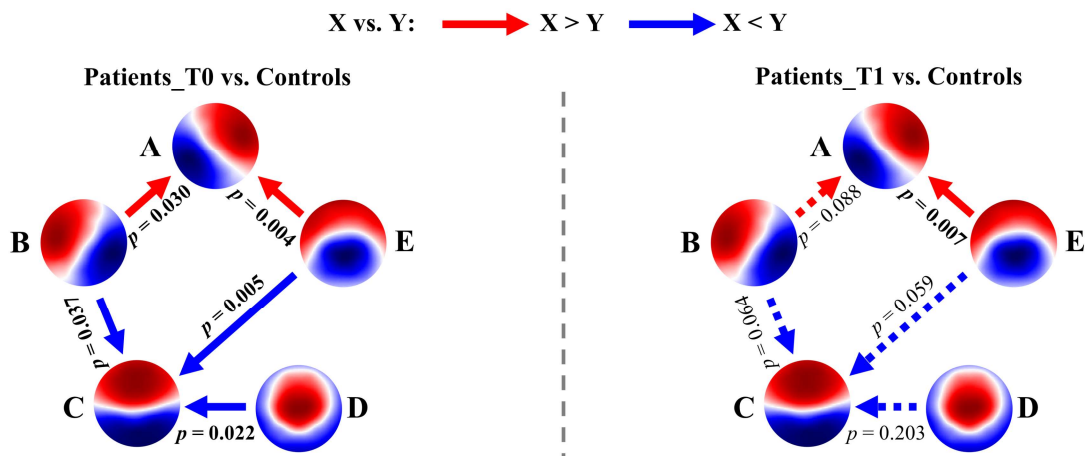

**Supplementary Figure 19. Results of comparisons between patients and healthy controls in TP.** The red color indicates increased transition probability between two microstate classes, and the blue color indicates decreased transition probability between two microstate classes. The solid arrows and bolded *p*-values indicate significant differences (without Bonferroni-Holm correction).

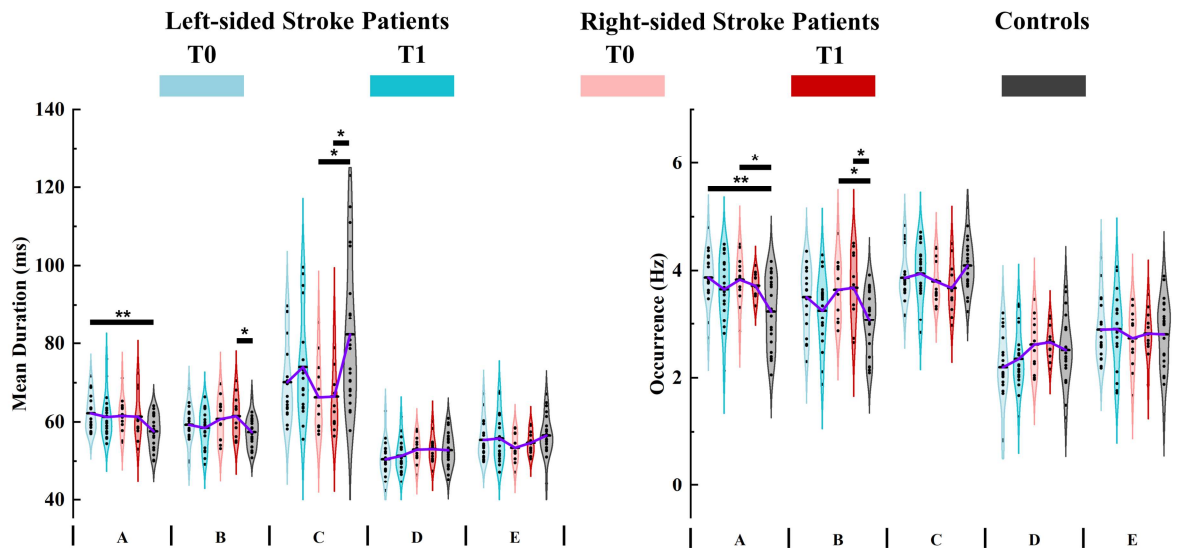

**Supplementary Figure 20. Results of microstate parameter analysis for subgroups of patients and controls.** Pairwise comparisons (Patients with left-sided stroke versus Patients with right-sided stroke at T0/T1; Patients with left-sided stroke at T0/T1 versus Controls; Patients with right-sided stroke at T0/T1 versus Controls) were performed for the mean duration, occurrence. The means of the five groups are linked by the solid purple line. \* $p < 0.05$ ; \*\* $p < 0.01$ .

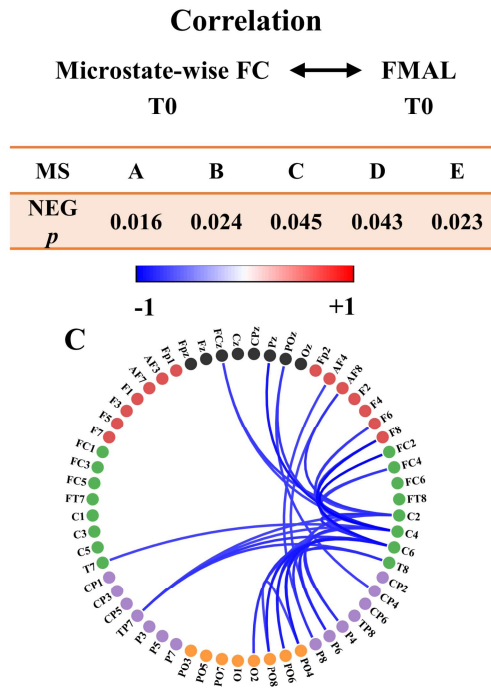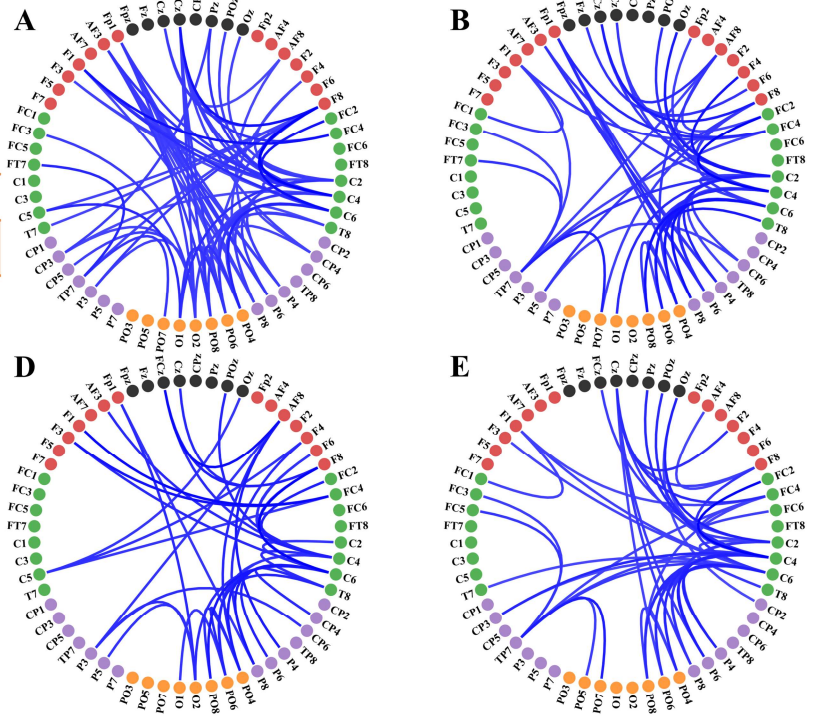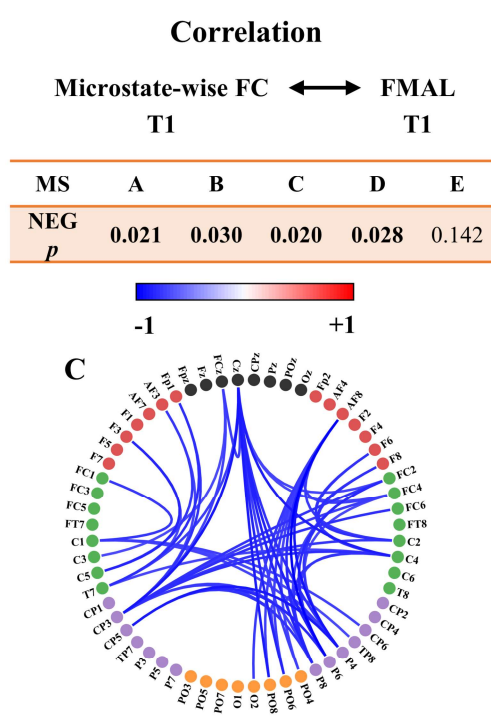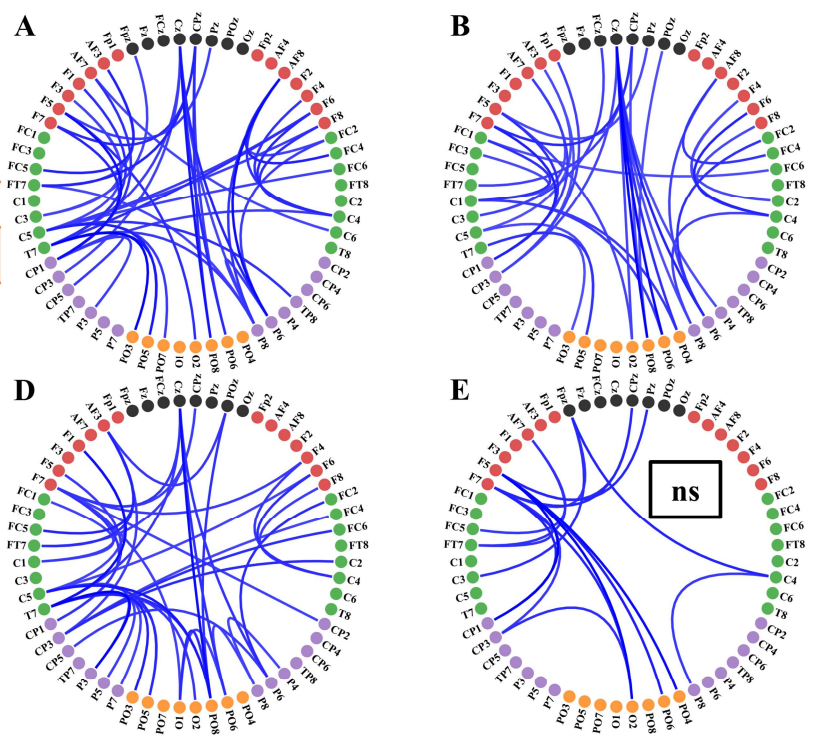

**Supplementary Figure 21. Results of correlation analysis between microstate-wise functional connectivity and FMAL.** For X vs. Y, the blue color indicates the negative correlations. Color depth indicates the size of the correlation. For each microstate class, the smallest *p*-value and corresponding connected component are provided. Only the connected components with *p* < 0.200 are displayed. MS: microstate class, NEG: negative, ns: nonsignificant.
